# Supplementary material for: Age-dependent H3K9 trimethylation by dSetdb1 impairs mitochondrial UPR leading to degeneration of olfactory neurons and loss of olfactory function in Drosophila
Source: eLife. 2026 Mar 26;15:e103118. doi: 10.7554/eLife.103118 (PMC13155754; doi:10.7554/eLife.103118)
Supplement: Source data 1. [file elife-103118-data1.xlsx]

## Sheet: Figure 1A-F
		Figure1C. Hsp60::dsRed integrated density						Figure1C. Hsp60::dsRed integrated density Two-way ANOVA Bonferroni's multiple comparisons test result
		Veh	PQ	Doxy				Dunnet's multiple comparisons test	Mean Diff.	95.00% CI of diff.	Adjusted P Value	n1	n2
		2.45266	3.2634	1.81045				Veh vs. PQ	-2.326	-3,472 to -1,180	0.0003	6	6
		1.3704	3.29972	3.06146				Veh vs. Doxy	-1.862	-3,008 to -0,7165	0.0024	6	6
		0.480192	2.91843	2.37585
		0.328483	4.23105	3.06223
		0.535946	1.91048	2.86538
		0.832317	4.33084	3.99932
		Figure1D. Hsc70-5::dsRed integrated density						Figure1D. Hsc70-5::dsRed integrated density Two-way ANOVA Bonferroni's multiple comparisons test result
		Veh	PQ	Doxy				Dunnet's multiple comparisons test	Mean Diff.	95.00% CI of diff.	Adjusted P Value	n1	n2
		1.10243	5.73707	10.3707				Veh vs. PQ	-4.607	-8,463 to -0,7511	0.0198	5	5
		1.69936	4.84493	9.90396				Veh vs. Doxy	-4.667	-8,523 to -0,8109	0.0184	5	5
		2.30031	6.39881	8.24554
		3.0633	9.71154	3.48751
		4.8346	9.34259	4.32593
											Figure 1F Two-way ANOVA with Bonferroni's multiple comparisons test results.
	Figure 1F Hsp60dsRed Integrated Density RNAI UPRmt										Bonferroni's multiple comparisons test	Mean Diff.	95.00% CI of diff.	Adjusted P Value	N1	N2
	Veh										Veh - PQ
	control	227663	221467	196936	210253	207092	298065	205131	122625		control	-296465	-515783 to -77147	0.0038	8	8
	dve	120986	225840	219713	247177	554633	483424	185637	68160.3		dve	6398	-212920 to 225716	>0.9999	8	8
	ubl	19902.3	19216.3	37477.2	61650.1	307961	517824	156296	19230.9		ubl	37284	-182034 to 256601	>0.9999	8	8
	crc	69277.6	1023.38	23809.7	4110	424004	187452	86232.3	25930.1		crc	-28710	-248703 to 191283	>0.9999	8	8
	PQ										Veh
	control	1.07239e+06	372053	371638	360244	388000	881667	412665	202296		control vs. dve	-52042	-257222 to 153138	0.8733	8	8
	dve	460732	311530	448358	339797	90778.8	284099	4168.32	114923		control vs. ubl	68709	-136471 to 273889	0.7575	8	8
	ubl	12416.2	6108.46	71762.1	12407.8	39307.4	224318	155370	319599		control vs. crc	108424	-97387 to 314236	0.4453	8	8
	crc	8068.72	2.09017	96366.9	285451	291077	240362	92936.4	37253		PQ
											control vs. dve	250821	45641 to 456001	0.0127	8	8
											control vs. ubl	402458	197278 to 607638	<0.0001	8	8
											control vs. crc	376180	170368 to 581991	0.0001	8	8

## Sheet: Figure 1G-L
	Fig. 1H ElavGFP AL volume
		0							45											Figure 1H Two-way ANOVA Dunnett´s multiple comparisons test results.
	Veh	36187.1	79757.8	54138.5	66911.6	56199.5	40300.9	71842	43499.4	53769.1	60211.6	34546.9	33970.3	55736.2	65075.6					Bonferroni´s multiple comparisons test	Mean Diff.	95.00% CI of diff.	Adjusted P Value	N1	N2
	PQ	72131.5	60166	84217.9	70166	72131.5	53434.3	90794	48155.5	58182.7	71174	80215.3	63886.9	68304.9	61245.5					0 vs 45
																				Veh	8361	-8264 to 24986	0.4255	7	7
																				PQ	7411	-9214 to 24036	0.5076	7	7
																				Veh vs PQ
	Fig. 1I Hsp60dsRed AL integrated density																			0	-13958	-30624 to 2708	0.1133	7	7
		0							45											45	-14908	-31574 to 1758	0.0857	7	7
	Veh	867806	2.35131e+06	3.60155e+06	3.21805e+06	4.06019e+06	1280291	4.08909e+06	1.49517e+06	2.2129e+06	1.44573e+06	423939	896058	3.27748e+06	2.91979e+06
	PQ	3.83681e+06	4.85359e+06	2.65496e+06	4.36214e+06	6.36856e+06	3.70937e+06	4.25863e+06	1.69145e+06	539881	1.69145e+06	3.08828e+06	1.71301e+06	1.47245e+06	3.59219e+06
																				Figure 1I Two-way ANOVA with Dunnet´s multiple comparisons test results.
																				Bonferroni´s multiple comparisons test	Mean Diff.	95.00% CI of diff.	Adjusted P Value	N1	N2
	Fig. 1K Single Cell analisis of Hsp60A																			0 vs 45
	Hsp60 vAChT					Hsp60 vGlut					Hsp60 Gad1									Veh	971030	-480263 to 2422323	0.2319	7	7
	0	15	30	50		0	15	30	50		0	15	30	50						PQ	2322193	870900 to 3773487	0.0017	7	7
	0	0	0	0		0	0	0	0		0	0	0	0						Veh vs PQ
	0	0	0	0		0	0	0	0		0	0	0	0						0	-1510823	-2962116 to -59530	0.0404	7	7
	0	0	0	0		0	0	0	0		0	0	0	0						-159660	-1610953 to 1291633	0.9581	7	7	7
	0	0	0	0		0	0	0	0		0	0	0	0
	0	0	0	0		0	0	0	0		0	0	0	0
	0	0	0	0		0	0	0	0		0	0	0	0
	0	0	0	0		0	0	0	0		0	0	0	0
	0	0	0	0		0	0	0	0		0	0	0	0						Figure 1K. Hsp60A vAChT One-way ANOVA with Dunnett's multiple comparison test results.
	0	0	0	0		0	0	0	0		0	0	0	0						Dunnett's multiple comparisons test	Mean Diff.	95.00% CI of diff.	Adjusted P Value	n1	n2
	0	0	0	0		0	0	0	0		0	0	0	0						0 vs. 1	-0.2145	-0.2811 to -0.1480	<0.0001	2649	2359
	0	0	0	0		0	0	0	0		0	0	0	0						0 vs. 15	0.3637	0.2813 to 0.4461	<0.0001	2649	1174
	0	0	0	0		0	0	0	0		0	0	0	0						0 vs. 30	0.08951	0.01301 to 0.1660	0.0127	2649	1465
	0	0	0	0		0	0	0	0		0	0	0	0						0 vs. 50	0.1377	0.02963 to 0.2457	0.0049	2649	576
	0	0	0	0		0	0	0	0		0	0	0	0
	0	0	0	0		0	0	0	0		0	0	0	0						Figure 2E. Hsp60A vGlut One-way ANOVA with Dunnett's multiple comparison test results.
	0	0	0	0		0	0	0	0		0	0	0	0						Dunnett's multiple comparisons test	Mean Diff.	95.00% CI of diff.	Adjusted P Value	n1	n2
	0	0	0	0		0	0	0	0		0	0	0	0						0 vs. 1	-0.2639	-0.3905 to -0.1373	<0.0001	699	713
	0	0	0	0		0	0	0	0		0	0	0	0						0 vs. 15	0.2712	0.1384 to 0.4041	<0.0001	699	592
	0	0	0	0		0	0	0	0		0	0	0	0						0 vs. 30	0.06113	-0.08602 to 0.2083	0.8367	699	417
	0	0	0	0		0	0	0	0		0	0	0	0						0 vs. 50	0.01253	-0.1918 to 0.2169	0.9998	699	168
	0	0	0	0		0	0	0	0		0	0	0	0
	0	0	0	0		0	0	0	0		0	0	0	0						Figure 2E. Hsp60A Gad1 One-way ANOVA with Dunnett's multiple comparison test results.
	0	0	0	0		0	0	0	0		0	0	0	0						Dunnett's multiple comparisons test	Mean Diff.	95.00% CI of diff.	Adjusted P Value	n1	n2
	0	0	0	0		0	0	0	0		0	0	0	0						0 vs. 1	-0.3671	-0.5217 to -0.2125	<0.0001	566	626
	0	0	0	0		0	0	0	0		0	0	0	0						0 vs. 15	-0.08056	-0.2760 to 0.1149	0.8431	566	277
	0	0	0	0		0	0	0	0		0	0	0	0						0 vs. 30	-0.2966	-0.4704 to -0.1229	<0.0001	566	403
	0	0	0	0		0	0	0	0		0	0	0	0						0 vs. 50	-0.263	-0.4972 to -0.02881	0.0191	566	168
	0	0	0	0		0	0	0	0		0	0	0	0
	0	0	0	0		0	0	0	0		0	0	0	0
	0	0	0	0		0	0	0	0		0	0	0	0						Figure 1L. Hsc70-5 vAChT One-way ANOVA with Dunnett's multiple comparison test results.
	0	0	0	0		0	0	0	0		0	0	0	0						Dunnett's multiple comparisons test	Mean Diff.	95.00% CI of diff.	Adjusted P Value	n1	n2
	0	0	0	0		0	0	0	0		0	0	0	0						0 vs. 1	0.06838	0.03039 to 0.1064	<0.0001	2649	2359
	0	0	0	0		0	0	0	0		0	0	0	0						0 vs. 15	0.2664	0.2193 to 0.3134	<0.0001	2649	1174
	0	0	0	0		0	0	0	0		0	0	0	0						0 vs. 30	0.2411	0.1974 to 0.2848	<0.0001	2649	1465
	0	0	0	0		0	0	0	0		0	0	0	0						0 vs. 50	0.2536	0.1919 to 0.3153	<0.0001	2649	576
	0	0	0	0		0	0	0	0		0	0	0	0
	0	0	0	0		0	0	0	0		0	0	0	0						Figure 2F. Hsc70-5 vGlut One-way ANOVA with Dunnett's multiple comparison test results.
	0	0	0	0		0	0	0	0		0	0	0	0						Dunnett's multiple comparisons test	Mean Diff.	95.00% CI of diff.	Adjusted P Value	n1	n2
	0	0	0	0		0	0	0	0		0	0	0	0						0 vs. 1	0.04616	-0.02837 to 0.1207	0.4517	699	713
	0	0	0	0		0	0	0	0		0	0	0	0						0 vs. 15	0.2584	0.1802 to 0.3366	<0.0001	699	592
	0	0	0	0		0	0	0	0		0	0	0	0						0 vs. 30	0.2248	0.1382 to 0.3114	<0.0001	699	417
	0	0	0	0		0	0	0	0		0	0	0	0						0 vs. 50	0.2023	0.08196 to 0.3226	<0.0001	699	168
	0	0	0	0		0	0	0	0		0	0	0	1
	0	0	0	0		0	0	0	0		0	0	0	1						Figure 2F. Hsc70-5 vGlut One-way ANOVA with Dunnett's multiple comparison test results.
	0	0	0	0		0	0	0	0		0	0	0	1						Dunnett's multiple comparisons test	Mean Diff.	95.00% CI of diff.	Adjusted P Value	n1	n2
	0	0	0	0		0	0	0	0		0	0	0	1						0 vs. 1	-0.06955	-0.1623 to 0.02324	0.2447	566	626
	0	0	0	0		0	0	0	0		0	0	0	1						0 vs. 15	0.07429	-0.04301 to 0.1916	0.427	566	277
	0	0	0	0		0	0	0	0		0	0	0	1						0 vs. 30	0.08289	-0.02138 to 0.1872	0.1905	566	403
	0	0	0	0		0	0	0	0		0	0	0	1						0 vs. 50	0.03274	-0.1078 to 0.1733	0.9914	566	168
	0	0	0	0		0	0	0	0		0	0	0	1
	0	0	0	0		0	0	0	0		0	0	0	1
	0	0	0	0		0	0	0	0		0	0	0	1
	0	0	0	0		0	0	0	0		0	0	0	1
	0	0	0	0		0	0	0	0		0	0	0	1
	0	0	0	0		0	0	0	0		0	0	0	1
	0	0	0	0		0	0	0	0		0	0	0	1
	0	0	0	0		0	0	0	0		0	0	0	1
	0	0	0	0		0	0	0	0		0	0	0	1
	0	0	0	0		0	0	0	0		0	0	0	1
	0	0	0	0		0	0	0	0		0	0	0	1
	0	0	0	0		0	0	0	0		0	0	0	1
	0	0	0	0		0	0	0	0		0	0	0	1
	0	0	0	0		0	0	0	0		0	0	0	1
	0	0	0	0		0	0	0	0		0	0	0	1
	0	0	0	0		0	0	0	0		0	0	0	1
	0	0	0	0		0	0	0	0		0	0	0	1
	0	0	0	0		0	0	0	0		0	0	0	1
	0	0	0	0		0	0	0	1		0	0	0	1
	0	0	0	0		0	0	0	1		0	0	0	1
	0	0	0	0		0	0	0	1		0	0	0	1
	0	0	0	0		0	0	0	1		0	0	0	1
	0	0	0	0		0	0	0	1		0	0	0	1
	0	0	0	0		0	0	0	1		0	0	0	1
	0	0	0	0		0	0	0	1		0	0	0	1
	0	0	0	0		0	0	0	1		0	0	0	1
	0	0	0	0		0	0	0	1		0	0	0	1
	0	0	0	0		0	0	0	1		0	0	0	1
	0	0	0	0		0	0	0	1		0	0	0	1
	0	0	0	0		0	0	0	1		0	0	0	1
	0	0	0	0		0	0	0	1		0	0	0	1
	0	0	0	0		0	0	0	1		0	0	0	1
	0	0	0	0		0	0	0	1		0	0	0	1
	0	0	0	0		0	0	0	1		0	0	0	1
	0	0	0	0		0	0	0	1		0	0	0	1
	0	0	0	0		0	0	0	1		0	0	0	1
	0	0	0	0		0	0	0	1		0	0	0	1
	0	0	0	0		0	0	0	1		0	0	0	1
	0	0	0	0		0	0	0	1		0	0	0	1
	0	0	0	0		0	0	0	1		0	0	0	1
	0	0	0	0		0	0	0	1		0	0	0	1.58496
	0	0	0	0		0	0	0	1		0	0	0	1.58496
	0	0	0	0		0	0	0	1		0	0	0	1.58496
	0	0	0	0		0	0	0	1		0	0	0	1.58496
	0	0	0	0		0	0	0	1		0	0	0	1.58496
	0	0	0	0		0	0	0	1		0	0	0	1.58496
	0	0	0	0		0	0	0	1		0	0	1	1.58496
	0	0	0	0		0	0	0	1		0	0	1	1.58496
	0	0	0	0		0	0	0	1		0	0	1	1.58496
	0	0	0	0		0	0	0	1		0	0	1	1.58496
	0	0	0	0		0	0	0	1		0	0	1	1.58496
	0	0	0	0		0	0	0	1		0	0	1	1.58496
	0	0	0	0		0	0	0	1		0	0	1	1.58496
	0	0	0	0		0	0	0	1		0	0	1	1.58496
	0	0	0	0		0	0	0	1		0	0	1	1.58496
	0	0	0	0		0	0	0	1		0	1	1	1.58496
	0	0	0	0		0	0	0	1		0	1	1	1.58496
	0	0	0	0		0	0	0	1		0	1	1	1.58496
	0	0	0	0		0	0	0	1		0	1	1	1.58496
	0	0	0	0		0	0	0	1		0	1	1	1.58496
	0	0	0	0		0	0	0	1		0	1	1	1.58496
	0	0	0	0		0	0	0	1		0	1	1	1.58496
	0	0	0	0		0	0	0	1		0	1	1	1.58496
	0	0	0	0		0	0	0	1		0	1	1	2
	0	0	0	0		0	0	0	1		0	1	1	2
	0	0	0	0		0	0	0	1		0	1	1	2
	0	0	0	0		0	0	0	1		0	1	1	2
	0	0	0	0		0	0	0	1		0	1	1	2
	0	0	0	0		0	0	0	1		0	1	1	2
	0	0	0	0		0	0	0	1.58496		0	1	1	2
	0	0	0	0		0	0	0	1.58496		0	1	1	2
	0	0	0	0		0	0	0	1.58496		0	1	1	2
	0	0	0	0		0	0	0	1.58496		0	1	1	2
	0	0	0	0		0	0	0	1.58496		0	1	1	2
	0	0	0	0		0	0	0	1.58496		0	1	1	2
	0	0	0	0		0	0	0	1.58496		0	1	1	2
	0	0	0	0		0	0	0	1.58496		0	1	1	2
	0	0	0	0		0	0	0	1.58496		0	1	1	2
	0	0	0	0		0	0	0	1.58496		0	1	1	2
	0	0	0	0		0	0	0	1.58496		0	1	1	2
	0	0	0	0		0	0	0	1.58496		0	1	1	2
	0	0	0	0		0	0	0	1.58496		0	1	1	2
	0	0	0	0		0	0	0	1.58496		0	1	1	2
	0	0	0	0		0	0	0	1.58496		0	1	1	2
	0	0	0	0		0	0	0	1.58496		0	1	1	2
	0	0	0	0		0	0	0	1.58496		0	1	1	2.32193
	0	0	0	0		0	0	0	1.58496		0	1	1	2.32193
	0	0	0	0		0	0	0	1.58496		0	1	1	2.32193
	0	0	0	0		0	0	0	1.58496		0	1	1	2.32193
	0	0	0	0		0	0	0	1.58496		0	1	1	2.32193
	0	0	0	0		0	0	0	1.58496		0	1	1	2.32193
	0	0	0	0		0	0	0	1.58496		0	1	1	2.32193
	0	0	0	0		0	0	0	1.58496		0	1	1	2.32193
	0	0	0	0		0	0	0	1.58496		0	1	1	2.58496
	0	0	0	0		0	0	0	1.58496		0	1	1	2.58496
	0	0	0	0		0	0	0	1.58496		0	1	1	2.58496
	0	0	0	0		0	0	0	1.58496		0	1	1	2.58496
	0	0	0	0		0	0	0	1.58496		0	1	1	2.58496
	0	0	0	0		0	0	0	1.58496		0	1	1	2.58496
	0	0	0	0		0	0	0	1.58496		0	1	1	2.58496
	0	0	0	0		0	0	0	2		0	1	1	2.80735
	0	0	0	0		0	0	0	2		0	1	1	2.80735
	0	0	0	0		0	0	0	2		0	1	1	2.80735
	0	0	0	0		0	0	0	2		0	1	1	2.80735
	0	0	0	0		0	0	0	2		0	1	1	2.80735
	0	0	0	0		0	0	0	2		0	1	1	2.80735
	0	0	0	0		0	0	0	2		0	1	1	2.80735
	0	0	0	0		0	0	0	2		0	1	1	3
	0	0	0	0		0	0	0	2		0	1	1	3
	0	0	0	0		0	0	0	2		0	1.58496	1	3
	0	0	0	0		0	0	0	2		0	1.58496	1	3
	0	0	0	0		0	0	0	2.32193		0	1.58496	1	3
	0	0	0	0		0	0	0	2.32193		0	1.58496	1	3
	0	0	0	0		0	0	0	2.32193		0	1.58496	1	3
	0	0	0	0		0	0	0	2.58496		0	1.58496	1	3.16992
	0	0	0	0		0	0	0	2.58496		0	1.58496	1	3.16992
	0	0	0	0		0	0	0	2.58496		0	1.58496	1	3.45943
	0	0	0	0		0	0	0	2.80735		0	1.58496	1	3.58496
	0	0	0	0		0	0	0	3.32193		0	1.58496	1	3.70044
	0	0	0	0		0	0	0			0	1.58496	1
	0	0	0	0		0	0	0			0	1.58496	1
	0	0	0	0		0	0	0			0	1.58496	1
	0	0	0	0		0	0	0			0	1.58496	1
	0	0	0	0		0	0	0			0	1.58496	1
	0	0	0	0		0	0	0			0	1.58496	1
	0	0	0	0		0	0	0			0	1.58496	1
	0	0	0	0		0	0	0			0	1.58496	1
	0	0	0	0		0	0	0			0	1.58496	1
	0	0	0	0		0	0	1			0	1.58496	1
	0	0	0	0		0	0	1			0	1.58496	1
	0	0	0	0		0	0	1			0	1.58496	1
	0	0	0	0		0	0	1			0	1.58496	1
	0	0	0	0		0	0	1			0	1.58496	1
	0	0	0	0		0	0	1			0	1.58496	1
	0	0	0	0		0	0	1			0	1.58496	1
	0	0	0	0		0	0	1			0	1.58496	1
	0	0	0	0		0	0	1			0	1.58496	1
	0	0	0	0		0	0	1			0	1.58496	1
	0	0	0	0		0	0	1			0	1.58496	1
	0	0	0	0		0	0	1			0	1.58496	1
	0	0	0	0		0	0	1			0	1.58496	1
	0	0	0	0		0	0	1			0	1.58496	1.58496
	0	0	0	0		0	0	1			0	1.58496	1.58496
	0	0	0	0		0	0	1			0	1.58496	1.58496
	0	0	0	0		0	0	1			0	1.58496	1.58496
	0	0	0	0		0	0	1			0	1.58496	1.58496
	0	0	0	0		0	0	1			0	1.58496	1.58496
	0	0	0	0		0	0	1			0	1.58496	1.58496
	0	0	0	0		0	0	1			0	1.58496	1.58496
	0	0	0	0		0	0	1			0	2	1.58496
	0	0	0	0		0	0	1			0	2	1.58496
	0	0	0	0		0	0	1			0	2	1.58496
	0	0	0	0		0	0	1			0	2	1.58496
	0	0	0	0		0	0	1			1	2	1.58496
	0	0	0	0		0	0	1			1	2	1.58496
	0	0	0	0		0	0	1			1	2	1.58496
	0	0	0	0		0	0	1			1	2	1.58496
	0	0	0	0		0	0	1			1	2	1.58496
	0	0	0	0		0	0	1			1	2	1.58496
	0	0	0	0		0	0	1			1	2	1.58496
	0	0	0	0		0	0	1			1	2	1.58496
	0	0	0	0		0	0	1			1	2	1.58496
	0	0	0	0		0	0	1			1	2	1.58496
	0	0	0	0		0	0	1			1	2	1.58496
	0	0	0	0		0	0	1			1	2	1.58496
	0	0	0	0		0	0	1			1	2	1.58496
	0	0	0	0		0	0	1			1	2	1.58496
	0	0	0	0		0	0	1			1	2	1.58496
	0	0	0	0		0	0	1			1	2	1.58496
	0	0	0	0		0	0	1			1	2	1.58496
	0	0	0	0		0	0	1			1	2	1.58496
	0	0	0	0		0	0	1			1	2	1.58496
	0	0	0	0		0	0	1			1	2	1.58496
	0	0	0	0		0	0	1			1	2	1.58496
	0	0	0	0		0	0	1			1	2	1.58496
	0	0	0	0		0	0	1			1	2	1.58496
	0	0	0	0		0	0	1			1	2.32193	1.58496
	0	0	0	0		0	0	1			1	2.32193	1.58496
	0	0	0	0		0	0	1			1	2.32193	1.58496
	0	0	0	0		0	0	1			1	2.32193	1.58496
	0	0	0	0		0	0	1			1	2.32193	1.58496
	0	0	0	0		0	0	1			1	2.32193	1.58496
	0	0	0	0		0	0	1			1	2.32193	1.58496
	0	0	0	0		0	0	1			1	2.32193	1.58496
	0	0	0	0		0	0	1			1	2.32193	1.58496
	0	0	0	0		0	0	1			1	2.32193	1.58496
	0	0	0	0		0	0	1			1	2.32193	1.58496
	0	0	0	0		0	0	1			1	2.32193	1.58496
	0	0	0	0		0	0	1			1	2.32193	1.58496
	0	0	0	0		0	0	1			1	2.32193	1.58496
	0	0	0	0		0	0	1			1	2.32193	1.58496
	0	0	0	0		0	0	1			1	2.32193	1.58496
	0	0	0	0		0	0	1			1	2.32193	1.58496
	0	0	0	0		0	0	1			1	2.32193	1.58496
	0	0	0	0		0	0	1			1	2.58496	1.58496
	0	0	0	0		0	0	1			1	2.58496	1.58496
	0	0	0	0		0	0	1			1	2.58496	1.58496
	0	0	0	0		0	0	1			1	2.58496	1.58496
	0	0	0	0		0	0	1			1	2.58496	1.58496
	0	0	0	0		0	0	1			1	2.58496	1.58496
	0	0	0	0		0	0	1			1	2.58496	1.58496
	0	0	0	0		0	0	1			1	2.58496	1.58496
	0	0	0	0		0	0	1			1	2.58496	1.58496
	0	0	0	0		0	0	1			1	2.58496	1.58496
	0	0	0	0		0	0	1			1	2.80735	1.58496
	0	0	0	0		0	0	1			1	2.80735	1.58496
	0	0	0	0		0	0	1			1	2.80735	1.58496
	0	0	0	0		0	0	1			1	2.80735	1.58496
	0	0	0	0		0	0	1			1	2.80735	1.58496
	0	0	0	0		0	0	1			1	2.80735	1.58496
	0	0	0	1		0	0	1			1	3	1.58496
	0	0	0	1		0	0	1			1	3	1.58496
	0	0	0	1		0	0	1			1	3	1.58496
	0	0	0	1		0	0	1			1	3	1.58496
	0	0	0	1		0	0	1			1	3	1.58496
	0	0	0	1		0	0	1			1	3	1.58496
	0	0	0	1		0	0	1			1	3	1.58496
	0	0	0	1		0	0	1			1	3.16992	1.58496
	0	0	0	1		0	0	1			1	3.16992	1.58496
	0	0	0	1		0	0	1			1	3.16992	1.58496
	0	0	0	1		0	0	1			1	3.32193	1.58496
	0	0	0	1		0	0	1			1	3.32193	1.58496
	0	0	0	1		0	0	1			1	3.45943	1.58496
	0	0	0	1		0	0	1			1	3.45943	1.58496
	0	0	0	1		0	0	1			1	3.45943	1.58496
	0	0	0	1		0	0	1			1	3.58496	1.58496
	0	0	0	1		0	0	1			1	3.80735	1.58496
	0	0	0	1		0	0	1			1	4.45943	1.58496
	0	0	0	1		0	0	1			1		1.58496
	0	0	0	1		0	0	1			1		2
	0	0	0	1		0	0	1			1		2
	0	0	0	1		0	0	1			1		2
	0	0	0	1		0	0	1			1		2
	0	0	0	1		0	0	1			1		2
	0	0	0	1		0	0	1			1		2
	0	0	0	1		0	0	1			1		2
	0	0	0	1		0	0	1			1		2
	0	0	0	1		0	0	1			1		2
	0	0	0	1		0	0	1			1		2
	0	0	0	1		0	0	1			1		2
	0	0	0	1		0	0	1			1		2
	0	0	0	1		0	0	1			1		2
	0	0	0	1		0	0	1			1		2
	0	0	0	1		0	0	1			1		2
	0	0	0	1		0	0	1			1		2
	0	0	0	1		0	0	1			1		2
	0	0	0	1		0	0	1			1		2
	0	0	0	1		0	0	1			1		2
	0	0	0	1		0	0	1			1		2
	0	0	0	1		0	0	1			1		2
	0	0	0	1		0	0	1			1		2
	0	0	0	1		0	0	1			1		2
	0	0	0	1		0	0	1			1		2
	0	0	0	1		0	0	1			1		2
	0	0	0	1		0	0	1			1		2
	0	0	0	1		0	0	1			1		2
	0	0	0	1		0	0	1			1		2
	0	0	0	1		0	0	1			1		2
	0	0	0	1		0	0	1			1		2
	0	0	0	1		0	0	1			1		2
	0	0	0	1		0	0	1			1		2
	0	0	0	1		0	0	1			1		2
	0	0	0	1		0	0	1			1		2
	0	0	0	1		0	0	1			1		2
	0	0	0	1		0	0	1			1		2
	0	0	0	1		0	0	1.58496			1		2
	0	0	0	1		0	0	1.58496			1		2
	0	0	0	1		0	0	1.58496			1		2
	0	0	0	1		0	0	1.58496			1		2
	0	0	0	1		0	0	1.58496			1		2
	0	0	0	1		1	0	1.58496			1		2
	0	0	0	1		1	0	1.58496			1		2
	0	0	0	1		1	0	1.58496			1		2.32193
	0	0	0	1		1	0	1.58496			1		2.32193
	0	0	0	1		1	0	1.58496			1		2.32193
	0	0	0	1		1	0	1.58496			1		2.32193
	0	0	0	1		1	0	1.58496			1		2.32193
	0	0	0	1		1	0	1.58496			1		2.32193
	0	0	0	1		1	0	1.58496			1		2.32193
	0	0	0	1		1	0	1.58496			1		2.32193
	0	0	0	1		1	0	1.58496			1		2.32193
	0	0	0	1		1	0	1.58496			1		2.32193
	0	0	0	1		1	0	1.58496			1		2.32193
	0	0	0	1		1	0	1.58496			1		2.32193
	0	0	0	1		1	0	1.58496			1		2.32193
	0	0	0	1		1	0	1.58496			1		2.32193
	0	0	0	1		1	0	1.58496			1		2.32193
	0	0	0	1		1	0	1.58496			1		2.32193
	0	0	0	1		1	0	1.58496			1		2.32193
	0	0	0	1		1	0	1.58496			1		2.32193
	0	0	0	1		1	0	1.58496			1		2.32193
	0	0	0	1		1	0	1.58496			1		2.32193
	0	0	0	1		1	1	1.58496			1		2.32193
	0	0	0	1		1	1	1.58496			1		2.32193
	0	0	0	1		1	1	1.58496			1		2.32193
	0	0	0	1		1	1	1.58496			1		2.32193
	0	0	0	1		1	1	1.58496			1		2.32193
	0	0	0	1		1	1	1.58496			1		2.32193
	0	0	0	1		1	1	1.58496			1		2.32193
	0	0	0	1		1	1	1.58496			1		2.32193
	0	0	0	1		1	1	1.58496			1		2.58496
	0	0	0	1		1	1	1.58496			1.58496		2.58496
	0	0	0	1		1	1	1.58496			1.58496		2.58496
	0	0	0	1		1	1	1.58496			1.58496		2.58496
	0	0	0	1		1	1	1.58496			1.58496		2.58496
	0	0	0	1		1	1	1.58496			1.58496		2.58496
	0	0	0	1		1	1	1.58496			1.58496		2.58496
	0	0	0	1		1	1	1.58496			1.58496		2.58496
	0	0	0	1		1	1	1.58496			1.58496		2.58496
	0	0	0	1		1	1	1.58496			1.58496		2.58496
	0	0	0	1		1	1	1.58496			1.58496		2.58496
	0	0	0	1		1	1	1.58496			1.58496		2.58496
	0	0	0	1		1	1	1.58496			1.58496		2.58496
	0	0	0	1		1	1	1.58496			1.58496		2.58496
	0	0	0	1		1	1	1.58496			1.58496		2.58496
	0	0	0	1		1	1	1.58496			1.58496		2.58496
	0	0	0	1		1	1	1.58496			1.58496		2.58496
	0	0	0	1		1	1	1.58496			1.58496		2.80735
	0	0	0	1		1	1	1.58496			1.58496		2.80735
	0	0	0	1		1	1	1.58496			1.58496		2.80735
	0	0	0	1		1	1	1.58496			1.58496		2.80735
	0	0	0	1		1	1	1.58496			1.58496		2.80735
	0	0	0	1		1	1	1.58496			1.58496		2.80735
	0	0	0	1		1	1	1.58496			1.58496		2.80735
	0	0	0	1		1	1	1.58496			1.58496		2.80735
	0	0	0	1		1	1	1.58496			1.58496		2.80735
	0	0	0	1		1	1	1.58496			1.58496		2.80735
	0	0	0	1		1	1	1.58496			1.58496		2.80735
	0	0	0	1		1	1	2			1.58496		3
	0	0	0	1		1	1	2			1.58496		3
	0	0	0	1		1	1	2			1.58496		3
	0	0	0	1		1	1	2			1.58496		3
	0	0	0	1		1	1	2			1.58496		3
	0	0	0	1		1	1	2			1.58496		3
	0	0	0	1		1	1	2			1.58496		3
	0	0	0	1		1	1	2			1.58496		3
	0	0	0	1		1	1	2			1.58496		3
	0	0	0	1		1	1	2			1.58496		3
	0	0	0	1		1	1	2			1.58496		3.16992
	0	0	0	1		1	1	2			1.58496		3.16992
	0	0	0	1		1	1	2			1.58496		3.16992
	0	0	0	1		1	1	2.32193			1.58496		3.16992
	0	0	0	1		1	1	2.32193			1.58496		3.16992
	0	0	0	1		1	1	2.32193			1.58496		3.32193
	0	0	0	1		1	1	2.32193			1.58496		3.32193
	0	0	0	1		1	1	2.32193			1.58496		3.32193
	0	0	0	1		1	1	2.32193			1.58496		3.45943
	0	0	0	1		1	1	2.32193			1.58496		3.58496
	0	0	0	1		1	1	2.32193			1.58496		3.58496
	0	0	0	1		1	1	2.32193			1.58496		3.58496
	0	0	0	1		1	1	2.32193			1.58496		3.58496
	0	0	0	1		1	1	2.58496			1.58496		3.70044
	0	0	0	1		1	1	2.58496			1.58496		3.80735
	0	0	0	1		1	1	2.58496			1.58496		4.32193
	0	0	0	1		1	1	2.58496			1.58496
	0	0	0	1		1	1	2.58496			1.58496
	0	0	0	1		1	1	2.58496			1.58496
	0	0	0	1		1	1	2.80735			1.58496
	0	0	0	1		1	1	2.80735			1.58496
	0	0	0	1		1	1	2.80735			1.58496
	0	0	0	1		1	1	2.80735			1.58496
	0	0	0	1		1	1	3			1.58496
	0	0	0	1		1	1	3			1.58496
	0	0	0	1		1	1	3			1.58496
	0	0	0	1		1	1	3.16992			1.58496
	0	0	0	1		1	1	3.16992			1.58496
	0	0	0	1		1	1	3.16992			1.58496
	0	0	0	1		1	1	3.32193			1.58496
	0	0	0	1		1	1				1.58496
	0	0	0	1		1	1				1.58496
	0	0	0	1		1	1				1.58496
	0	0	0	1		1	1				1.58496
	0	0	0	1		1	1				1.58496
	0	0	0	1		1	1				1.58496
	0	0	0	1		1	1				1.58496
	0	0	0	1		1	1				1.58496
	0	0	0	1		1	1				1.58496
	0	0	0	1		1	1				1.58496
	0	0	0	1		1	1				1.58496
	0	0	0	1		1	1				1.58496
	0	0	0	1		1	1				1.58496
	0	0	0	1		1	1				1.58496
	0	0	0	1		1	1				1.58496
	0	0	0	1		1	1				1.58496
	0	0	0	1		1	1				1.58496
	0	0	0	1		1	1				2
	0	0	0	1		1	1				2
	0	0	0	1		1	1				2
	0	0	0	1		1	1				2
	0	0	0	1		1	1				2
	0	0	0	1		1	1				2
	0	0	0	1		1	1				2
	0	0	0	1		1	1				2
	0	0	0	1		1	1				2
	0	0	0	1		1	1				2
	0	0	0	1		1	1				2
	0	0	0	1		1	1				2
	0	0	0	1		1	1				2
	0	0	0	1.58496		1	1				2
	0	0	0	1.58496		1	1				2
	0	0	0	1.58496		1	1				2
	0	0	0	1.58496		1	1				2
	0	0	0	1.58496		1	1				2
	0	0	0	1.58496		1	1				2
	0	0	0	1.58496		1	1				2
	0	0	0	1.58496		1	1				2
	0	0	0	1.58496		1	1				2
	0	0	0	1.58496		1	1				2
	0	0	0	1.58496		1	1				2
	0	0	0	1.58496		1	1				2
	0	0	0	1.58496		1	1				2
	0	0	0	1.58496		1	1				2
	0	0	0	1.58496		1	1				2
	0	0	0	1.58496		1	1				2
	0	0	0	1.58496		1	1				2
	0	0	0	1.58496		1	1				2
	0	0	0	1.58496		1	1				2
	0	0	0	1.58496		1	1				2
	0	0	0	1.58496		1	1				2
	0	0	0	1.58496		1	1				2
	0	0	0	1.58496		1	1				2
	0	0	0	1.58496		1	1				2
	0	0	0	1.58496		1	1				2
	0	0	0	1.58496		1	1				2
	0	0	0	1.58496		1	1				2
	0	0	0	1.58496		1	1				2
	0	0	0	1.58496		1.58496	1				2
	0	0	0	1.58496		1.58496	1				2
	0	0	0	1.58496		1.58496	1				2
	0	0	0	1.58496		1.58496	1				2
	0	0	0	1.58496		1.58496	1				2
	0	0	0	1.58496		1.58496	1				2
	0	0	0	1.58496		1.58496	1				2
	0	0	0	1.58496		1.58496	1				2
	0	0	0	1.58496		1.58496	1				2
	0	0	0	1.58496		1.58496	1				2
	0	0	0	1.58496		1.58496	1.58496				2
	0	0	0	1.58496		1.58496	1.58496				2
	0	0	0	1.58496		1.58496	1.58496				2
	0	0	0	1.58496		1.58496	1.58496				2
	0	0	0	1.58496		1.58496	1.58496				2.32193
	0	0	0	1.58496		1.58496	1.58496				2.32193
	0	0	0	1.58496		1.58496	1.58496				2.32193
	0	0	0	1.58496		1.58496	1.58496				2.32193
	0	0	0	1.58496		1.58496	1.58496				2.32193
	0	0	0	1.58496		1.58496	1.58496				2.32193
	0	0	0	1.58496		1.58496	1.58496				2.32193
	0	0	0	1.58496		1.58496	1.58496				2.32193
	0	0	0	1.58496		1.58496	1.58496				2.32193
	0	0	0	1.58496		1.58496	1.58496				2.32193
	0	0	0	1.58496		1.58496	1.58496				2.32193
	0	0	0	1.58496		1.58496	1.58496				2.32193
	0	0	0	1.58496		1.58496	1.58496				2.32193
	0	0	0	1.58496		1.58496	1.58496				2.32193
	0	0	0	1.58496		1.58496	1.58496				2.32193
	0	0	0	1.58496		1.58496	1.58496				2.32193
	0	0	0	1.58496		1.58496	1.58496				2.32193
	0	0	0	1.58496		1.58496	1.58496				2.32193
	0	0	0	1.58496		1.58496	1.58496				2.32193
	0	0	0	1.58496		1.58496	1.58496				2.32193
	0	0	0	1.58496		1.58496	1.58496				2.32193
	0	0	0	1.58496		1.58496	1.58496				2.32193
	0	0	0	1.58496		1.58496	1.58496				2.32193
	0	0	0	1.58496		1.58496	1.58496				2.32193
	0	0	0	1.58496		1.58496	1.58496				2.32193
	0	0	0	1.58496		1.58496	1.58496				2.32193
	0	0	0	1.58496		1.58496	1.58496				2.32193
	0	0	0	1.58496		1.58496	1.58496				2.32193
	0	0	0	1.58496		1.58496	1.58496				2.32193
	0	0	0	1.58496		1.58496	1.58496				2.32193
	0	0	0	1.58496		1.58496	1.58496				2.58496
	0	0	0	1.58496		1.58496	1.58496				2.58496
	0	0	0	1.58496		1.58496	1.58496				2.58496
	0	0	0	1.58496		1.58496	1.58496				2.58496
	0	0	0	1.58496		1.58496	1.58496				2.58496
	0	0	0	1.58496		1.58496	1.58496				2.58496
	0	0	0	1.58496		1.58496	1.58496				2.58496
	0	0	0	2		1.58496	1.58496				2.58496
	0	0	0	2		1.58496	1.58496				2.58496
	0	0	0	2		1.58496	1.58496				2.58496
	0	0	0	2		1.58496	1.58496				2.58496
	0	0	0	2		1.58496	1.58496				2.58496
	0	0	0	2		1.58496	1.58496				2.58496
	0	0	0	2		1.58496	1.58496				2.58496
	0	0	0	2		1.58496	1.58496				2.58496
	0	0	0	2		1.58496	1.58496				2.80735
	0	0	0	2		1.58496	1.58496				2.80735
	0	0	0	2		1.58496	1.58496				2.80735
	0	0	0	2		1.58496	1.58496				2.80735
	0	0	0	2		1.58496	1.58496				2.80735
	0	0	0	2		1.58496	1.58496				2.80735
	0	0	0	2		1.58496	1.58496				2.80735
	0	0	0	2		1.58496	1.58496				2.80735
	0	0	0	2		1.58496	2				2.80735
	0	0	0	2		1.58496	2				2.80735
	0	0	0	2		1.58496	2				2.80735
	0	0	0	2		1.58496	2				2.80735
	0	0	0	2		1.58496	2				2.80735
	0	0	0	2		1.58496	2				2.80735
	0	0	0	2		1.58496	2				2.80735
	0	0	0	2		1.58496	2				3
	0	0	0	2		1.58496	2				3
	0	0	0	2		1.58496	2				3
	0	0	0	2		1.58496	2				3
	0	0	0	2		1.58496	2				3.16992
	0	0	0	2		1.58496	2				3.16992
	0	0	0	2		1.58496	2				3.16992
	0	0	0	2		1.58496	2				3.16992
	0	0	0	2		1.58496	2				3.16992
	0	0	0	2		1.58496	2				3.16992
	0	0	0	2		1.58496	2				3.16992
	0	0	0	2		1.58496	2				3.32193
	0	0	0	2.32193		1.58496	2				3.45943
	0	0	0	2.32193		1.58496	2				3.80735
	0	0	0	2.32193		1.58496	2				3.80735
	0	0	0	2.32193		1.58496	2				4.08746
	0	0	0	2.32193		1.58496	2.32193				4.24793
	0	0	0	2.32193		1.58496	2.32193
	0	0	0	2.58496		1.58496	2.32193
	0	0	0	2.58496		1.58496	2.32193
	0	0	0	2.58496		1.58496	2.32193
	0	0	0	2.58496		1.58496	2.32193
	0	0	0	2.58496		1.58496	2.32193
	0	0	0	2.58496		1.58496	2.32193
	0	0	0	2.58496		1.58496	2.32193
	0	0	0	2.80735		1.58496	2.32193
	0	0	0	3		1.58496	2.32193
	0	0	0			1.58496	2.32193
	0	0	0			1.58496	2.32193
	0	0	0			1.58496	2.32193
	0	0	0			1.58496	2.32193
	0	0	0			1.58496	2.32193
	0	0	0			1.58496	2.58496
	0	0	0			1.58496	2.58496
	0	0	0			1.58496	2.58496
	0	0	0			1.58496	2.58496
	0	0	0			1.58496	2.58496
	0	0	0			2	2.80735
	0	0	0			2	3
	0	0	0			2	3.16992
	0	0	0			2	3.32193
	0	0	0			2	3.58496
	0	0	0			2	4.39232
	0	0	0			2
	0	0	0			2
	0	0	0			2
	0	0	0			2
	0	0	0			2
	0	0	0			2
	0	0	0			2
	0	0	0			2
	0	0	0			2
	0	0	0			2
	0	0	0			2
	0	0	0			2
	0	0	0			2
	0	0	0			2
	0	0	0			2
	0	0	0			2
	0	0	0			2
	0	0	0			2
	0	0	0			2
	0	0	0			2
	0	0	0			2
	0	0	0			2
	0	0	0			2
	0	0	0			2
	0	0	0			2
	0	0	0			2
	0	0	0			2
	0	0	0			2
	0	0	0			2
	0	0	0			2
	0	0	0			2
	0	0	0			2
	0	0	0			2
	0	0	0			2
	0	0	0			2
	0	0	0			2
	0	0	0			2
	0	0	0			2
	0	0	0			2
	0	0	0			2
	0	0	0			2
	0	0	0			2
	0	0	0			2
	0	0	0			2
	0	0	0			2
	0	0	0			2
	0	0	0			2
	0	0	0			2.32193
	0	0	0			2.32193
	0	0	0			2.32193
	0	0	0			2.32193
	0	0	0			2.32193
	0	0	0			2.32193
	0	0	0			2.32193
	0	0	0			2.32193
	0	0	0			2.32193
	0	0	0			2.32193
	0	0	0			2.32193
	0	0	1			2.32193
	0	0	1			2.32193
	0	0	1			2.32193
	0	0	1			2.32193
	0	0	1			2.32193
	0	0	1			2.32193
	0	0	1			2.32193
	0	0	1			2.32193
	0	0	1			2.32193
	0	0	1			2.32193
	0	0	1			2.32193
	0	0	1			2.32193
	0	0	1			2.32193
	0	0	1			2.58496
	0	0	1			2.58496
	0	0	1			2.58496
	0	0	1			2.58496
	0	0	1			2.58496
	0	0	1			2.58496
	0	0	1			2.58496
	0	0	1			2.58496
	0	0	1			2.58496
	0	0	1			2.80735
	0	0	1			2.80735
	0	0	1			2.80735
	0	0	1			2.80735
	0	0	1			2.80735
	0	0	1			2.80735
	0	0	1			2.80735
	0	0	1			2.80735
	0	0	1			2.80735
	0	0	1			3
	0	0	1			3
	0	0	1			3
	0	0	1			3.16992
	0	0	1			3.16992
	0	0	1			3.16992
	0	0	1			3.32193
	0	0	1			3.32193
	0	0	1			3.32193
	0	0	1			3.45943
	0	0	1			3.45943
	0	0	1			3.58496
	0	0	1			3.58496
	0	0	1			3.70044
	0	0	1			3.70044
	0	0	1			3.80735
	0	0	1			3.80735
	0	0	1			3.90689
	0	0	1
	0	0	1
	0	0	1
	0	0	1
	0	0	1
	0	0	1
	0	0	1
	0	0	1
	0	0	1
	0	0	1
	0	0	1
	0	0	1
	0	0	1
	0	0	1
	0	0	1
	0	0	1
	0	0	1
	0	0	1
	0	0	1
	0	0	1
	0	0	1
	0	0	1
	0	0	1
	0	0	1
	0	0	1
	0	0	1
	0	0	1
	0	0	1
	0	0	1
	0	0	1
	0	0	1
	0	0	1
	0	0	1
	0	0	1
	0	0	1
	0	0	1
	0	1	1
	0	1	1
	0	1	1
	0	1	1
	0	1	1
	0	1	1
	0	1	1
	0	1	1
	0	1	1
	0	1	1
	0	1	1
	0	1	1
	0	1	1
	0	1	1
	0	1	1
	0	1	1
	0	1	1
	0	1	1
	0	1	1
	0	1	1
	0	1	1
	0	1	1
	0	1	1
	0	1	1
	0	1	1
	0	1	1
	0	1	1
	0	1	1
	0	1	1
	0	1	1
	0	1	1
	0	1	1
	0	1	1
	0	1	1
	0	1	1
	0	1	1
	0	1	1
	0	1	1
	0	1	1
	0	1	1
	0	1	1
	0	1	1
	0	1	1
	0	1	1
	0	1	1
	0	1	1
	0	1	1
	0	1	1
	0	1	1
	0	1	1
	0	1	1
	0	1	1
	0	1	1
	0	1	1
	0	1	1
	0	1	1
	0	1	1
	0	1	1
	0	1	1
	0	1	1
	0	1	1
	0	1	1
	0	1	1
	0	1	1
	0	1	1
	0	1	1
	0	1	1
	0	1	1
	0	1	1
	0	1	1
	0	1	1
	0	1	1
	0	1	1
	0	1	1
	0	1	1
	0	1	1
	0	1	1
	0	1	1
	0	1	1
	0	1	1
	0	1	1
	0	1	1
	0	1	1
	0	1	1
	0	1	1
	0	1	1
	0	1	1
	0	1	1
	0	1	1
	0	1	1
	0	1	1
	0	1	1
	0	1	1
	0	1	1
	0	1	1
	0	1	1
	0	1	1
	0	1	1
	0	1	1
	0	1	1
	0	1	1
	0	1	1
	0	1	1
	0	1	1
	0	1	1
	0	1	1
	0	1	1
	0	1	1
	0	1	1
	0	1	1
	0	1	1
	0	1	1
	0	1	1
	0	1	1
	0	1	1
	0	1	1
	0	1	1
	0	1	1
	0	1	1
	0	1	1
	0	1	1
	0	1	1
	0	1	1
	0	1	1
	0	1	1
	0	1	1
	0	1	1
	0	1	1
	0	1	1
	0	1	1
	0	1	1
	0	1	1
	0	1	1
	0	1	1
	0	1	1
	0	1	1
	0	1	1
	0	1	1
	0	1	1
	0	1	1
	0	1	1
	0	1	1
	0	1	1
	0	1	1
	0	1	1
	0	1	1
	0	1	1
	0	1	1
	0	1	1
	0	1	1
	0	1	1
	0	1	1
	0	1	1
	0	1	1
	0	1	1
	0	1	1
	0	1	1
	0	1	1
	0	1	1
	0	1	1
	0	1	1
	0	1	1
	0	1	1
	0	1	1
	0	1	1
	0	1	1
	0	1	1
	0	1	1
	0	1	1
	0	1	1
	0	1	1
	0	1	1
	0	1	1
	0	1	1
	0	1	1
	0	1	1
	0	1	1
	0	1	1
	0	1	1
	0	1	1
	0	1	1
	0	1	1
	0	1	1
	0	1	1
	0	1	1
	0	1	1
	0	1	1
	0	1	1
	0	1	1
	0	1	1
	0	1	1
	0	1	1
	0	1	1
	0	1	1
	0	1	1
	0	1	1
	0	1	1
	0	1	1
	0	1	1
	0	1	1
	0	1	1
	0	1	1
	0	1	1
	0	1	1
	0	1	1
	0	1	1
	0	1	1
	0	1	1
	0	1	1
	0	1	1
	0	1	1
	0	1	1
	0	1	1
	0	1	1
	0	1	1
	0	1	1
	0	1	1
	0	1	1
	0	1	1
	0	1	1
	0	1	1
	0	1	1
	0	1	1
	0	1	1
	0	1	1
	0	1	1
	0	1	1
	0	1	1
	0	1	1
	0	1	1
	0	1	1
	0	1	1
	0	1	1
	0	1	1
	0	1	1
	0	1	1
	0	1	1
	0	1	1
	0	1	1
	0	1	1
	0	1	1
	0	1	1
	0	1	1
	0	1	1
	0	1	1
	0	1	1
	0	1	1
	0	1	1
	0	1	1
	0	1	1
	0	1	1
	0	1	1
	0	1	1
	0	1	1
	0	1	1
	0	1	1
	0	1	1
	0	1	1
	0	1	1
	0	1	1
	0	1	1
	0	1	1
	0	1	1
	0	1	1
	0	1	1
	0	1	1
	0	1	1
	0	1	1
	0	1	1
	0	1.58496	1
	0	1.58496	1
	0	1.58496	1
	0	1.58496	1
	0	1.58496	1
	0	1.58496	1
	0	1.58496	1
	0	1.58496	1
	0	1.58496	1
	0	1.58496	1
	0	1.58496	1
	0	1.58496	1
	0	1.58496	1
	0	1.58496	1
	0	1.58496	1
	0	1.58496	1
	0	1.58496	1
	0	1.58496	1
	0	1.58496	1
	0	1.58496	1
	0	1.58496	1
	0	1.58496	1
	0	1.58496	1
	0	1.58496	1
	0	1.58496	1
	0	1.58496	1
	0	1.58496	1
	0	1.58496	1
	0	1.58496	1
	0	1.58496	1
	0	1.58496	1
	0	1.58496	1
	0	1.58496	1
	0	1.58496	1
	0	1.58496	1
	0	1.58496	1
	0	1.58496	1
	0	1.58496	1
	0	1.58496	1
	0	1.58496	1
	0	1.58496	1
	0	1.58496	1
	0	1.58496	1
	0	1.58496	1
	0	1.58496	1
	0	1.58496	1
	0	1.58496	1
	0	1.58496	1
	0	1.58496	1
	0	1.58496	1
	0	1.58496	1
	0	1.58496	1
	0	1.58496	1
	0	1.58496	1
	0	1.58496	1
	0	1.58496	1
	0	1.58496	1
	0	1.58496	1
	0	1.58496	1
	0	1.58496	1
	0	1.58496	1
	0	1.58496	1
	0	1.58496	1
	0	1.58496	1
	0	1.58496	1
	0	1.58496	1
	0	1.58496	1
	0	1.58496	1
	0	1.58496	1
	0	1.58496	1
	0	1.58496	1
	0	1.58496	1
	0	1.58496	1
	0	1.58496	1
	0	1.58496	1
	0	1.58496	1
	0	1.58496	1
	0	1.58496	1
	0	1.58496	1
	0	1.58496	1
	0	1.58496	1
	0	1.58496	1
	0	1.58496	1.58496
	0	1.58496	1.58496
	0	1.58496	1.58496
	0	1.58496	1.58496
	0	1.58496	1.58496
	0	1.58496	1.58496
	0	1.58496	1.58496
	0	1.58496	1.58496
	0	1.58496	1.58496
	0	1.58496	1.58496
	0	1.58496	1.58496
	0	1.58496	1.58496
	0	2	1.58496
	0	2	1.58496
	0	2	1.58496
	0	2	1.58496
	0	2	1.58496
	0	2	1.58496
	0	2	1.58496
	0	2	1.58496
	0	2	1.58496
	0	2	1.58496
	0	2	1.58496
	0	2	1.58496
	0	2	1.58496
	0	2	1.58496
	0	2	1.58496
	0	2	1.58496
	0	2	1.58496
	0	2	1.58496
	0	2	1.58496
	0	2	1.58496
	0	2	1.58496
	0	2	1.58496
	0	2	1.58496
	0	2	1.58496
	0	2	1.58496
	0	2	1.58496
	0	2	1.58496
	0	2	1.58496
	0	2	1.58496
	0	2	1.58496
	0	2	1.58496
	0	2	1.58496
	0	2	1.58496
	0	2	1.58496
	0	2	1.58496
	0	2	1.58496
	0	2	1.58496
	0	2	1.58496
	0	2	1.58496
	0	2	1.58496
	0	2	1.58496
	0	2	1.58496
	0	2	1.58496
	0	2	1.58496
	0	2	1.58496
	0	2	1.58496
	0	2	1.58496
	0	2.32193	1.58496
	0	2.32193	1.58496
	0	2.32193	1.58496
	0	2.32193	1.58496
	0	2.32193	1.58496
	0	2.32193	1.58496
	0	2.32193	1.58496
	0	2.32193	1.58496
	0	2.32193	1.58496
	0	2.58496	1.58496
	0	2.58496	1.58496
	0	2.58496	1.58496
	0	2.58496	1.58496
	0	2.80735	1.58496
	0	2.80735	1.58496
	0	2.80735	1.58496
	0	2.80735	1.58496
	0	2.80735	1.58496
	0	2.80735	1.58496
	0	2.80735	1.58496
	0	2.80735	1.58496
	0	2.80735	1.58496
	0	3	1.58496
	0	3	1.58496
	0	3.16992	1.58496
	0	3.32193	1.58496
	0	3.58496	1.58496
	0	3.58496	1.58496
	0	4.64386	1.58496
	0		1.58496
	0		1.58496
	0		1.58496
	0		1.58496
	0		1.58496
	0		1.58496
	0		1.58496
	0		1.58496
	0		1.58496
	0		1.58496
	0		1.58496
	0		1.58496
	0		1.58496
	0		1.58496
	0		1.58496
	0		1.58496
	0		1.58496
	0		1.58496
	0		1.58496
	0		1.58496
	0		1.58496
	0		1.58496
	1		1.58496
	1		1.58496
	1		1.58496
	1		1.58496
	1		1.58496
	1		1.58496
	1		1.58496
	1		1.58496
	1		1.58496
	1		1.58496
	1		1.58496
	1		1.58496
	1		1.58496
	1		1.58496
	1		1.58496
	1		1.58496
	1		1.58496
	1		1.58496
	1		1.58496
	1		1.58496
	1		1.58496
	1		1.58496
	1		1.58496
	1		1.58496
	1		1.58496
	1		1.58496
	1		1.58496
	1		1.58496
	1		1.58496
	1		1.58496
	1		1.58496
	1		1.58496
	1		1.58496
	1		1.58496
	1		1.58496
	1		1.58496
	1		1.58496
	1		1.58496
	1		1.58496
	1		1.58496
	1		1.58496
	1		1.58496
	1		1.58496
	1		1.58496
	1		1.58496
	1		1.58496
	1		1.58496
	1		1.58496
	1		1.58496
	1		1.58496
	1		1.58496
	1		1.58496
	1		1.58496
	1		1.58496
	1		1.58496
	1		1.58496
	1		1.58496
	1		1.58496
	1		1.58496
	1		1.58496
	1		1.58496
	1		1.58496
	1		1.58496
	1		1.58496
	1		1.58496
	1		1.58496
	1		1.58496
	1		1.58496
	1		1.58496
	1		1.58496
	1		1.58496
	1		1.58496
	1		1.58496
	1		1.58496
	1		1.58496
	1		1.58496
	1		1.58496
	1		1.58496
	1		1.58496
	1		1.58496
	1		1.58496
	1		1.58496
	1		1.58496
	1		1.58496
	1		1.58496
	1		1.58496
	1		1.58496
	1		1.58496
	1		1.58496
	1		1.58496
	1		1.58496
	1		1.58496
	1		1.58496
	1		1.58496
	1		1.58496
	1		1.58496
	1		1.58496
	1		1.58496
	1		1.58496
	1		1.58496
	1		1.58496
	1		1.58496
	1		1.58496
	1		1.58496
	1		1.58496
	1		1.58496
	1		1.58496
	1		1.58496
	1		1.58496
	1		1.58496
	1		1.58496
	1		1.58496
	1		1.58496
	1		1.58496
	1		1.58496
	1		1.58496
	1		1.58496
	1		1.58496
	1		2
	1		2
	1		2
	1		2
	1		2
	1		2
	1		2
	1		2
	1		2
	1		2
	1		2
	1		2
	1		2
	1		2
	1		2
	1		2
	1		2
	1		2
	1		2
	1		2
	1		2
	1		2
	1		2
	1		2
	1		2
	1		2
	1		2
	1		2
	1		2
	1		2
	1		2
	1		2
	1		2
	1		2
	1		2
	1		2
	1		2
	1		2
	1		2
	1		2
	1		2
	1		2
	1		2
	1		2
	1		2
	1		2
	1		2
	1		2
	1		2
	1		2
	1		2
	1		2
	1		2
	1		2
	1		2
	1		2
	1		2
	1		2
	1		2
	1		2
	1		2
	1		2
	1		2
	1		2
	1		2
	1		2
	1		2
	1		2
	1		2
	1		2
	1		2
	1		2
	1		2
	1		2
	1		2
	1		2
	1		2
	1		2
	1		2
	1		2
	1		2
	1		2
	1		2.32193
	1		2.32193
	1		2.32193
	1		2.32193
	1		2.32193
	1		2.32193
	1		2.32193
	1		2.32193
	1		2.32193
	1		2.32193
	1		2.32193
	1		2.32193
	1		2.32193
	1		2.32193
	1		2.32193
	1		2.32193
	1		2.32193
	1		2.32193
	1		2.32193
	1		2.32193
	1		2.32193
	1		2.32193
	1		2.32193
	1		2.32193
	1		2.32193
	1		2.32193
	1		2.32193
	1		2.32193
	1		2.32193
	1		2.32193
	1		2.58496
	1		2.58496
	1		2.58496
	1		2.58496
	1		2.58496
	1		2.58496
	1		2.58496
	1		2.58496
	1		2.58496
	1		2.58496
	1		2.58496
	1		2.58496
	1		2.58496
	1		2.58496
	1		2.58496
	1		2.58496
	1		2.58496
	1		2.58496
	1		2.58496
	1		2.58496
	1		2.58496
	1		2.80735
	1		2.80735
	1		2.80735
	1		2.80735
	1		2.80735
	1		2.80735
	1		2.80735
	1		3
	1		3
	1		3.16992
	1		3.16992
	1		3.16992
	1		3.16992
	1		3.32193
	1		3.32193
	1		3.32193
	1		3.80735
	1		4
	1
	1
	1
	1
	1
	1
	1
	1
	1
	1
	1
	1
	1
	1
	1
	1
	1
	1
	1
	1
	1
	1
	1
	1
	1
	1
	1
	1
	1
	1
	1
	1
	1
	1
	1
	1
	1
	1
	1
	1
	1
	1
	1
	1
	1
	1
	1
	1
	1
	1
	1
	1
	1
	1
	1
	1
	1
	1
	1
	1
	1
	1
	1
	1
	1
	1
	1
	1
	1
	1
	1
	1
	1
	1
	1
	1
	1
	1
	1
	1
	1
	1
	1
	1
	1
	1
	1
	1
	1
	1
	1
	1
	1
	1
	1
	1
	1
	1
	1
	1
	1
	1
	1
	1
	1
	1
	1
	1
	1
	1
	1
	1
	1
	1
	1
	1
	1
	1
	1
	1
	1
	1
	1
	1
	1
	1
	1
	1
	1
	1
	1
	1
	1
	1
	1
	1
	1
	1
	1
	1
	1
	1
	1
	1
	1
	1
	1
	1
	1
	1
	1
	1
	1
	1
	1
	1
	1
	1
	1
	1
	1
	1
	1
	1
	1
	1
	1
	1
	1
	1
	1
	1
	1
	1
	1
	1
	1
	1
	1
	1
	1
	1
	1
	1
	1
	1
	1
	1
	1
	1
	1
	1
	1
	1
	1
	1
	1
	1
	1
	1
	1
	1
	1
	1
	1
	1
	1
	1
	1
	1
	1
	1
	1
	1
	1
	1
	1
	1
	1
	1
	1
	1
	1
	1
	1
	1
	1
	1
	1
	1
	1
	1
	1
	1
	1
	1
	1
	1
	1
	1
	1
	1
	1
	1
	1
	1
	1
	1
	1
	1
	1
	1
	1
	1
	1
	1
	1
	1
	1
	1
	1
	1
	1
	1
	1
	1
	1
	1
	1
	1
	1
	1
	1
	1
	1
	1
	1
	1
	1
	1
	1
	1
	1
	1
	1
	1
	1
	1
	1
	1
	1
	1
	1
	1
	1
	1
	1
	1
	1
	1
	1
	1
	1
	1
	1
	1
	1
	1
	1
	1
	1
	1
	1
	1
	1
	1
	1
	1
	1
	1
	1
	1
	1
	1
	1
	1
	1
	1
	1
	1
	1
	1
	1
	1
	1
	1
	1
	1
	1
	1
	1
	1
	1
	1
	1
	1
	1
	1
	1
	1
	1
	1
	1
	1
	1
	1
	1
	1
	1
	1
	1
	1
	1
	1
	1
	1
	1
	1
	1
	1
	1
	1
	1
	1
	1
	1
	1
	1
	1
	1
	1
	1
	1
	1.58496
	1.58496
	1.58496
	1.58496
	1.58496
	1.58496
	1.58496
	1.58496
	1.58496
	1.58496
	1.58496
	1.58496
	1.58496
	1.58496
	1.58496
	1.58496
	1.58496
	1.58496
	1.58496
	1.58496
	1.58496
	1.58496
	1.58496
	1.58496
	1.58496
	1.58496
	1.58496
	1.58496
	1.58496
	1.58496
	1.58496
	1.58496
	1.58496
	1.58496
	1.58496
	1.58496
	1.58496
	1.58496
	1.58496
	1.58496
	1.58496
	1.58496
	1.58496
	1.58496
	1.58496
	1.58496
	1.58496
	1.58496
	1.58496
	1.58496
	1.58496
	1.58496
	1.58496
	1.58496
	1.58496
	1.58496
	1.58496
	1.58496
	1.58496
	1.58496
	1.58496
	1.58496
	1.58496
	1.58496
	1.58496
	1.58496
	1.58496
	1.58496
	1.58496
	1.58496
	1.58496
	1.58496
	1.58496
	1.58496
	1.58496
	1.58496
	1.58496
	1.58496
	1.58496
	1.58496
	1.58496
	1.58496
	1.58496
	1.58496
	1.58496
	1.58496
	1.58496
	1.58496
	1.58496
	1.58496
	1.58496
	1.58496
	1.58496
	1.58496
	1.58496
	1.58496
	1.58496
	1.58496
	1.58496
	1.58496
	1.58496
	1.58496
	1.58496
	1.58496
	1.58496
	1.58496
	1.58496
	1.58496
	1.58496
	1.58496
	1.58496
	1.58496
	1.58496
	1.58496
	1.58496
	1.58496
	1.58496
	1.58496
	1.58496
	1.58496
	1.58496
	1.58496
	1.58496
	1.58496
	1.58496
	1.58496
	1.58496
	1.58496
	1.58496
	1.58496
	1.58496
	1.58496
	1.58496
	1.58496
	1.58496
	1.58496
[truncated: 3,317 more rows]

## Sheet: Figure 2
																Figure 2A. H3K9Me3 levels (A.U.) Two-way ANOVA Bonferroni's multiple comparisons test result
																Bonferroni's multiple comparisons test	Mean Diff.	95.00% CI of diff.	Adjusted P Value	N1	N2
																0 vs 45
																Control	-0.2997	-0.5579 to -0.04144	0.0255	3	3
	Fig. 2A WesternBlot H3K9Me3 dSetdb1 RNAi young and aged															dSetdb1 RNAi	-0.1171	-0.3753 to 0.1412	0.4951	3	3
		0			45											Control - dSetdb1 RNAi
	Control RNAi	1.05442	0.696324	1.24926	3.32444	1.92612	2.48396									0	-0.06002	-0.3183 to 0.1982	>0.9999	3	3
	dSetdb1 RNAi	1.00708	0.947471	1.99362	1.79928	1.26908	2.72932									45	0.1226	-0.1356 to 0.3808	0.4556	3	3
																Figure 2C. Hsp60::dsRed integrated density Two-way ANOVA Bonferroni's multiple comparisons test result
																Bonferroni's multiple comparisons test	Mean Diff.	95.00% CI of diff.	Adjusted P Value	N1	N2
																0 vs 45
	Figure 2C. Hsp60::dsRed integrated density															Control	0.05416	-0.5236 to 0.6319	>0.9999	10	10
	0 dpe															Eggless Lof	-0.6834	-1.261 to -0.1057	0.0178	10	10
	Control	1.26952	0.432618	0.971315	1.28033	0.616181	0.747047	1.08201	1.45098	1.71202	0.707501					Control - Eggless Lof
	Eggless Lof	1.14814	2.28301	1.14842	2.39093	1.24251	1.41105	1.23144	1.35412	1.07555	1.79504					0 dpe	-0.4811	-1.059 to 0.09667	0.1186	10	10
	45 dpe															45 dpe	-1.219	-1.796 to -0.6409	<0.0001	10	10
	Control	1.14842	0.438153	1.14814	0.872616	1.07562	1.24251	0.488628	0.728256	1.23144	1.35412
	Eggless Lof	4.24599	2.05156	1.97979	1.44952	1.7311	1.76593	2.96387	2.41371	1.56273	1.75046					Figure 2E. Hsc70-5::dsRed integrated density Two-way ANOVA Bonferroni's multiple comparisons test result
																Bonferroni's multiple comparisons test	Mean Diff.	95.00% CI of diff.	Adjusted P Value	N1	N2
																0 vs 45
	Figure 2E. Hsc70-5::dsRed integrated density															Control	0.1377	-0.5628 to 0.8382	0.8633	8	8
	0															dSetdb1 Lof	-0.7865	-1.487 to -0.08602	0.0276	8	8
	Control	0.610976	0.661413	1.01447	0.753116	2.32927	0.871185	0.942255	0.817309							Control - dSetdb1 Lof
	Eggless Lof	1.1463	1.5624	3.28299	1.86044	1.0844	2.02665	1.31366	1.33773							0	-0.7018	-1.396 to -0.007964	0.0471	8	8
	45															45	-1.626	-2.320 to -0.9322	<0.0001	8	8
	Control	1.55208	0.51698	0.946841	0.51698	0.412667	0.440178	1.90285	0.609829
	Eggless Lof	2.62387	2.05916	3.0442	2.23197	2.64673	2.86474	1.60585	2.83018
																Figure 2G. dSetdb1 AUC in vAChT One-way ANOVA with Dunnett's multiple comparison test results.
	Fig. 2G dSetdb1 expression levels (AUC) in vAChT, vGlut and Gad1 positive cells															Dunnett's multiple comparisons test	Mean Diff.	95.00% CI of diff.	Adjusted P Value	n1	n2
	dSetdb1 vAChT					dSetdb1 vGlut					dSetdb1 Gad1					0 vs. 15	0.02253	0.005772 to 0.03929	0.0042	2932	1337
	1	15	30	50		1	15	30	50		1	15	30	50		0 vs. 30	0.01424	-0.001408 to 0.02989	0.0858	2932	1643
	0	0	0	0		0	0	0	0		0	0	0	0		0 vs. 50	0.0146	-0.007329 to 0.03654	0.2906	2932	656
	0	0	0	0		0	0	0	0		0	0	0	0
	0	0	0	0		0	0	0	0		0	0	0	0		Figure 2H. utx AUC in vAChT two-way ANOVA with Dunnett's multiple comparison test results.
	0	0	0	0		0	0	0	0		0	0	0	0		Dunnett's multiple comparisons test	Mean Diff.	95.00% CI of diff.	Adjusted P Value	n1	n2
	0	0	0	0		0	0	0	0		0	0	0	0		0 vs. 15	0.05449	0.02835 to 0.08063	<0.0001	2932	1337
	0	0	0	0		0	0	0	0		0	0	0	0		0 vs. 30	0.03632	0.01190 to 0.06073	0.0012	2932	1643
	0	0	0	0		0	0	0	0		0	0	0	0		0 vs. 50	0.05953	0.02532 to 0.09375	0.0001	2932	656
	0	0	0	0		0	0	0	0		0	0	0	0
	0	0	0	0		0	0	0	0		0	0	0	0		Figure 2I. kdm2 AUC in vAChT two-way ANOVA with Dunnett's multiple comparison test results.
	0	0	0	0		0	0	0	0		0	0	0	0		Dunnett's multiple comparisons test	Mean Diff.	95.00% CI of diff.	Adjusted P Value	n1	n2
	0	0	0	0		0	0	0	0		0	0	0	0		0 vs. 15	0.07854	0.05448 to 0.1026	<0.0001	2932	1337
	0	0	0	0		0	0	0	0		0	0	0	0		0 vs. 30	0.05777	0.03530 to 0.08023	<0.0001	2932	1643
	0	0	0	0		0	0	0	0		0	0	0	0		0 vs. 50	0.0712	0.03972 to 0.1027	<0.0001	2932	656
	0	0	0	0		0	0	0	0		0	0	0	0
	0	0	0	0		0	0	0	0		0	0	0	0		Figure 2G. dSetdb1 AUC in vGlut two-way ANOVA with Dunnett's multiple comparison test results.
	0	0	0	0		0	0	0	0		0	0	0	0		Dunnett's multiple comparisons test	Mean Diff.	95.00% CI of diff.	Adjusted P Value	n1	n2
	0	0	0	0		0	0	0	0		0	0	0	0		0 vs. 15	0.0346	0.006570 to 0.06262	0.01	712	615
	0	0	0	0		0	0	0	0		0	0	0	0		0 vs. 30	0.03331	0.002245 to 0.06438	0.0315	712	431
	0	0	0	0		0	0	0	0		0	0	0	0		0 vs. 50	0.016	-0.02725 to 0.05925	0.7386	712	172
	0	0	0	0		0	0	0	0		0	0	0	0
	0	0	0	0		0	0	0	0		0	0	0	0		Figure 2H. utx AUC in vGlut One-way ANOVA with Dunnett's multiple comparison test results.
	0	0	0	0		0	0	0	0		0	0	0	0		Dunnett's multiple comparisons test	Mean Diff.	95.00% CI of diff.	Adjusted P Value	n1	n2
	0	0	0	0		0	0	0	0		0	0	0	0		0 vs. 15	0.04324	-0.001518 to 0.08799	0.0619	712	615
	0	0	0	0		0	0	0	0		0	0	0	0		0 vs. 30	0.03886	-0.01075 to 0.08848	0.1731	712	431
	0	0	0	0		0	0	0	0		0	0	0	0		0 vs. 50	0.08456	0.01549 to 0.1536	0.0104	712	172
	0	0	0	0		0	0	0	0		0	0	0	0
	0	0	0	0		0	0	0	0		0	0	0	0		Figure 2I. kdm2 AUC in vGlut two-way ANOVA with Dunnett's multiple comparison test results.
	0	0	0	0		0	0	0	0		0	0	0	0		Dunnett's multiple comparisons test	Mean Diff.	95.00% CI of diff.	Adjusted P Value	n1	n2
	0	0	0	0		0	0	0	0		0	0	0	0		0 vs. 15	0.05197	0.01656 to 0.08738	0.0014	712	615
	0	0	0	0		0	0	0	0		0	0	0	0		0 vs. 30	0.05419	0.01493 to 0.09344	0.003	712	431
	0	0	0	0		0	0	0	0		0	0	0	0		0 vs. 50	0.03546	-0.01918 to 0.09011	0.321	712	172
	0	0	0	0		0	0	0	0		0	0	0	0
	0	0	0	0		0	0	0	0		0	0	0	0		Figure 2G. dSetdb1 AUC in Gad1 two-way ANOVA with Dunnett's multiple comparison test results.
	0	0	0	0		0	0	0	0		0	0	0	0		Dunnett's multiple comparisons test	Mean Diff.	95.00% CI of diff.	Adjusted P Value	n1	n2
	0	0	0	0		0	0	0	0		0	0	0	0		0 vs. 15	0.01408	-0.01999 to 0.04816	0.6902	576	377
	0	0	0	0		0	0	0	0		0	0	0	0		0 vs. 30	0.002722	-0.02970 to 0.03515	0.996	576	447
	0	0	0	0		0	0	0	0		0	0	0	0		0 vs. 50	-0.01134	-0.05380 to 0.03111	0.8916	576	197
	0	0	0	0		0	0	0	0		0	0	0	0
	0	0	0	0		0	0	0	0		0	0	0	0		Figure 2H. utx AUC in Gad1 two-way ANOVA with Dunnett's multiple comparison test results.
	0	0	0	0		0	0	0	0		0	0	0	0		Dunnett's multiple comparisons test	Mean Diff.	95.00% CI of diff.	Adjusted P Value	n1	n2
	0	0	0	0		0	0	0	0		0	0	0	0		0 vs. 15	0.03841	-0.01805 to 0.09488	0.281	576	377
	0	0	0	0		0	0	0	0		0	0	0	0		0 vs. 30	0.005096	-0.04863 to 0.05883	0.9942	576	447
	0	0	0	0		0	0	0	0		0	0	0	0		0 vs. 50	0.06676	-0.003599 to 0.1371	0.0688	576	197
	0	0	0	0		0	0	0	0		0	0	0	0
	0	0	0	0		0	0	0	0		0	0	0	0		Figure 2I. kdm2 AUC in Gad1 two-way ANOVA with Dunnett's multiple comparison test results.
	0	0	0	0		0	0	0	0		0	0	0	0		Dunnett's multiple comparisons test	Mean Diff.	95.00% CI of diff.	Adjusted P Value	n1	n2
	0	0	0	0		0	0	0	0		0	0	0	0		0 vs. 15	0.002805	-0.04629 to 0.05190	0.9987	576	377
	0	0	0	0		0	0	0	0		0	0	0	0		0 vs. 30	0.01243	-0.03428 to 0.05915	0.8926	576	447
	0	0	0	0		0	0	0	0		0	0	0	0		0 vs. 50	0.02616	-0.03501 to 0.08733	0.667	576	197
	0	0	0	0		0	0	0	0		0	0	0	0
	0	0	0	0		0	0	0	0		0	0	0	0
	0	0	0	0		0	0	0	0		0	0	0	0
	0	0	0	0		0	0	0	0		0	0	0	0
	0	0	0	0		0	0	0	0		0	0	0	0
	0	0	0	0		0	0	0	0		0	0	0	0
	0	0	0	0		0	0	0	0		0	0	0	0
	0	0	0	0		0	0	0	0		0	0	0	0
	0	0	0	0		0	0	0	0		0	0	0	0
	0	0	0	0		0	0	0	0		0	0	0	0
	0	0	0	0		0	0	0	0		0	0	0	0
	0	0	0	0		0	0	0	0		0	0	0	0
	0	0	0	0		0	0	0	0		0	0	0	0
	0	0	0	0		0	0	0	0		0	0	0	0
	0	0	0	0		0	0	0	0		0	0	0	0
	0	0	0	0		0	0	0	0		0	0	0	0
	0	0	0	0		0	0	0	0		0	0	0	0
	0	0	0	0		0	0	0	0		0	0	0	0
	0	0	0	0		0	0	0	0		0	0	0	0
	0	0	0	0		0	0	0	0		0	0	0	0
	0	0	0	0		0	0	0	0		0	0	0	0
	0	0	0	0		0	0	0	0		0	0	0	0
	0	0	0	0		0	0	0	0		0	0	0	0
	0	0	0	0		0	0	0	0		0	0	0	0
	0	0	0	0		0	0	0	0		0	0	0	0
	0	0	0	0		0	0	0	0		0	0	0	0
	0	0	0	0		0	0	0	0		0	0	0	0
	0	0	0	0		0	0	0	0		0	0	0	0
	0	0	0	0		0	0	0	0		0	0	0	0
	0	0	0	0		0	0	0	0		0	0	0	0
	0	0	0	0		0	0	0	0		0	0	0	0
	0	0	0	0		0	0	0	0		0	0	0	0
	0	0	0	0		0	0	0	0		0	0	0	0
	0	0	0	0		0	0	0	0		0	0	0	0
	0	0	0	0		0	0	0	0		0	0	0	0
	0	0	0	0		0	0	0	0		0	0	0	0
	0	0	0	0		0	0	0	0		0	0	0	0
	0	0	0	0		0	0	0	0		0	0	0	0
	0	0	0	0		0	0	0	0		0	0	0	0
	0	0	0	0		0	0	0	0		0	0	0	0
	0	0	0	0		0	0	0	0		0	0	0	0
	0	0	0	0		0	0	0	0		0	0	0	0
	0	0	0	0		0	0	0	0		0	0	0	0
	0	0	0	0		0	0	0	0		0	0	0	0
	0	0	0	0		0	0	0	0		0	0	0	0
	0	0	0	0		0	0	0	0		0	0	0	0
	0	0	0	0		0	0	0	0		0	0	0	0
	0	0	0	0		0	0	0	0		0	0	0	0
	0	0	0	0		0	0	0	0		0	0	0	0
	0	0	0	0		0	0	0	0		0	0	0	0
	0	0	0	0		0	0	0	0		0	0	0	0
	0	0	0	0		0	0	0	0		0	0	0	0
	0	0	0	0		0	0	0	0		0	0	0	0
	0	0	0	0		0	0	0	0		0	0	0	0
	0	0	0	0		0	0	0	0		0	0	0	0
	0	0	0	0		0	0	0	0		0	0	0	0
	0	0	0	0		0	0	0	0		0	0	0	0
	0	0	0	0		0	0	0	0		0	0	0	0
	0	0	0	0		0	0	0	0		0	0	0	0
	0	0	0	0		0	0	0	0		0	0	0	0
	0	0	0	0		0	0	0	0		0	0	0	0
	0	0	0	0		0	0	0	0		0	0	0	0
	0	0	0	0		0	0	0	0		0	0	0	0
	0	0	0	0		0	0	0	0		0	0	0	0
	0	0	0	0		0	0	0	0		0	0	0	0
	0	0	0	0		0	0	0	0		0	0	0	0
	0	0	0	0		0	0	0	0		0	0	0	0
	0	0	0	0		0	0	0	0		0	0	0	0
	0	0	0	0		0	0	0	0		0	0	0	0
	0	0	0	0		0	0	0	0		0	0	0	0
	0	0	0	0		0	0	0	0		0	0	0	0
	0	0	0	0		0	0	0	0		0	0	0	0
	0	0	0	0		0	0	0	0		0	0	0	0
	0	0	0	0		0	0	0	0		0	0	0	0
	0	0	0	0		0	0	0	0		0	0	0	0
	0	0	0	0		0	0	0	0		0	0	0	0
	0	0	0	0		0	0	0	0		0	0	0	0
	0	0	0	0		0	0	0	0		0	0	0	0
	0	0	0	0		0	0	0	0		0	0	0	0
	0	0	0	0		0	0	0	0		0	0	0	0
	0	0	0	0		0	0	0	0		0	0	0	0
	0	0	0	0		0	0	0	0		0	0	0	0
	0	0	0	0		0	0	0	0		0	0	0	0
	0	0	0	0		0	0	0	0		0	0	0	0
	0	0	0	0		0	0	0	0		0	0	0	0
	0	0	0	0		0	0	0	0		0	0	0	0
	0	0	0	0		0	0	0	0		0	0	0	0
	0	0	0	0		0	0	0	0		0	0	0	0
	0	0	0	0		0	0	0	0		0	0	0	0
	0	0	0	0		0	0	0	0		0	0	0	0
	0	0	0	0		0	0	0	0		0	0	0	0
	0	0	0	0		0	0	0	0		0	0	0	0
	0	0	0	0		0	0	0	0		0	0	0	0
	0	0	0	0		0	0	0	0		0	0	0	0
	0	0	0	0		0	0	0	1		0	0	0	0
	0	0	0	0		0	0	0	1		0	0	0	0
	0	0	0	0		0	0	0	0		0	0	0	0
	0	0	0	0		0	0	0	1		0	0	0	0
	0	0	0	0		0	0	0	0		0	0	0	0
	0	0	0	0		0	0	0	0		0	0	0	0
	0	0	0	0		0	0	0	0		0	0	0	0
	0	0	0	0		0	0	0	1		0	0	0	0
	0	0	0	0		0	0	0	0		0	0	0	0
	0	0	0	0		0	0	0	0		0	0	0	0
	0	0	0	0		0	0	0	0		0	0	0	0
	0	0	0	0		0	0	0	0		0	0	0	0
	0	0	0	0		0	0	0	0		0	0	0	0
	0	0	0	0		0	0	0	0		0	0	0	0
	0	0	0	0		0	0	0	1		0	0	0	0
	0	0	0	0		0	0	0	0		0	0	0	0
	0	0	0	0		0	0	0	0		0	0	0	0
	0	0	0	0		0	0	0	0		0	0	0	1
	0	0	0	0		0	0	0	1		0	0	0	1
	0	0	0	0		0	0	0	1		0	0	0	1
	0	0	0	0		0	0	0	0		0	0	0	0
	0	0	0	0		0	0	0	0		0	0	0	0
	0	0	0	0		0	0	0	0		0	0	0	0
	0	0	0	0		0	0	0	0		0	0	0	0
	0	0	0	0		0	0	0	1		0	0	0	0
	0	0	0	0		0	0	0	0		0	0	0	0
	0	0	0	0		0	0	0	0		0	0	0	0
	0	0	0	0		0	0	0	0		0	0	0	0
	0	0	0	0		0	0	0	0		0	0	0	1
	0	0	0	0		0	0	0			0	0	0	0
	0	0	0	0		0	0	0			0	0	0	1
	0	0	0	0		0	0	0			0	0	0	0
	0	0	0	0		0	0	0			0	0	0	1
	0	0	0	0		0	0	0			0	0	0	0
	0	0	0	0		0	0	0			0	0	0	0
	0	0	0	0		0	0	0			0	0	0	0
	0	0	0	0		0	0	0			0	0	0	1
	0	0	0	0		0	0	0			0	0	0	0
	0	0	0	0		0	0	0			0	0	0	0
	0	0	0	0		0	0	0			0	0	0	0
	0	0	0	0		0	0	0			0	0	0	0
	0	0	0	0		0	0	0			0	0	0	0
	0	0	0	0		0	0	0			0	0	0	0
	0	0	0	0		0	0	0			0	0	0	0
	0	0	0	0		0	0	0			0	0	0	0
	0	0	0	0		0	0	0			0	0	0	0
	0	0	0	0		0	0	0			0	0	0	0
	0	0	0	0		0	0	0			0	0	0	0
	0	0	0	0		0	0	0			0	0	0	1
	0	0	0	0		0	0	0			0	0	0	0
	0	0	0	0		0	0	0			0	0	0	1
	0	0	0	0		0	0	0			0	0	0	1
	0	0	0	0		0	0	0			0	0	0	0
	0	0	0	0		0	0	0			0	0	0	1.58496
	0	0	0	0		0	0	0			0	0	0
	0	0	0	0		0	0	0			0	0	0
	0	0	0	0		0	0	0			0	0	0
	0	0	0	0		0	0	0			0	0	0
	0	0	0	0		0	0	0			0	0	0
	0	0	0	0		0	0	0			0	0	0
	0	0	0	0		0	0	0			0	0	0
	0	0	0	0		0	0	0			0	0	0
	0	0	0	0		0	0	0			0	0	0
	0	0	0	0		0	0	0			0	0	0
	0	0	0	0		0	0	0			0	0	0
	0	0	0	0		0	0	0			0	0	0
	0	0	0	0		0	0	0			0	0	0
	0	0	0	0		0	0	0			0	0	0
	0	0	0	0		0	0	0			0	0	0
	0	0	0	0		0	0	0			0	0	0
	0	0	0	0		0	0	0			0	0	0
	0	0	0	0		0	0	0			0	0	0
	0	0	0	0		0	0	0			0	0	0
	0	0	0	0		0	0	0			0	0	0
	0	0	0	0		0	0	0			0	0	0
	0	0	0	0		0	0	0			0	0	0
	0	0	0	0		0	0	0			0	0	0
	0	0	0	0		0	0	0			0	0	0
	0	0	0	0		0	0	0			0	0	0
	0	0	0	0		0	0	0			0	0	0
	0	0	0	0		0	0	0			0	0	0
	0	0	0	0		0	0	0			0	0	0
	0	0	0	0		0	0	0			0	0	0
	0	0	0	0		0	0	0			0	0	0
	0	0	0	0		0	0	0			0	0	0
	0	0	0	0		0	0	0			0	0	0
	0	0	0	0		0	0	0			0	0	0
	0	0	0	0		0	0	0			0	0	0
	0	0	0	0		0	0	0			0	0	0
	0	0	0	0		0	0	0			0	0	0
	0	0	0	0		0	0	0			0	0	0
	0	0	0	0		0	0	0			0	0	0
	0	0	0	0		0	0	0			0	0	0
	0	0	0	0		0	0	0			0	0	0
	0	0	0	0		0	0	0			0	0	0
	0	0	0	0		0	0	0			0	0	0
	0	0	0	0		0	0	0			0	0	0
	0	0	0	0		0	0	0			0	0	0
	0	0	0	0		0	0	0			0	0	0
	0	0	0	0		0	0	0			0	0	0
	0	0	0	0		0	0	0			0	0	0
	0	0	0	0		0	0	0			0	0	0
	0	0	0	0		0	0	0			0	0	0
	0	0	0	0		0	0	0			0	0	0
	0	0	0	0		0	0	0			0	0	0
	0	0	0	0		0	0	0			0	0	0
	0	0	0	0		0	0	0			0	0	0
	0	0	0	0		0	0	0			0	0	0
	0	0	0	0		0	0	0			0	0	0
	0	0	0	0		0	0	0			0	0	0
	0	0	0	0		0	0	0			0	0	0
	0	0	0	0		0	0	0			0	0	0
	0	0	0	0		0	0	0			0	0	0
	0	0	0	0		0	0	0			0	0	0
	0	0	0	0		0	0	0			0	0	0
	0	0	0	0		0	0	0			0	0	0
	0	0	0	0		0	0	0			0	0	0
	0	0	0	0		0	0	0			0	0	0
	0	0	0	0		0	0	0			0	0	0
	0	0	0	0		0	0	0			0	0	0
	0	0	0	0		0	0	0			0	0	0
	0	0	0	0		0	0	0			0	0	0
	0	0	0	0		0	0	0			0	0	0
	0	0	0	0		0	0	0			0	0	0
	0	0	0	0		0	0	0			0	0	0
	0	0	0	0		0	0	0			0	0	0
	0	0	0	0		0	0	0			0	0	0
	0	0	0	0		0	0	0			0	0	0
	0	0	0	0		0	0	0			0	0	0
	0	0	0	0		0	0	0			0	0	0
	0	0	0	0		0	0	0			0	0	0
	0	0	0	0		0	0	0			0	0	0
	0	0	0	0		0	0	0			0	0	0
	0	0	0	0		0	0	0			0	0	0
	0	0	0	0		0	0	0			0	0	0
	0	0	0	0		0	0	0			0	0	0
	0	0	0	0		0	0	0			0	0	0
	0	0	0	0		0	0	0			0	0	0
	0	0	0	0		0	0	0			0	0	0
	0	0	0	0		0	0	0			0	0	0
	0	0	0	0		0	0	0			0	0	0
	0	0	0	0		0	0	0			0	0	0
	0	0	0	0		0	0	0			0	0	0
	0	0	0	0		0	0	0			0	0	0
	0	0	0	0		0	0	0			0	0	0
	0	0	0	0		0	0	0			0	0	0
	0	0	0	0		0	0	0			0	0	0
	0	0	0	0		0	0	0			0	0	0
	0	0	0	0		0	0	0			0	0	0
	0	0	0	0		0	0	0			0	0	0
	0	0	0	0		0	0	0			0	0	0
	0	0	0	0		0	0	0			0	0	0
	0	0	0	0		0	0	0			0	0	0
	0	0	0	0		0	0	0			0	0	0
	0	0	0	0		0	0	0			0	0	0
	0	0	0	0		0	0	0			0	0	0
	0	0	0	0		0	0	0			0	0	0
	0	0	0	0		0	0	0			0	0	0
	0	0	0	0		0	0	0			0	0	0
	0	0	0	0		0	0	0			0	0	0
	0	0	0	0		0	0	0			0	0	0
	0	0	0	0		0	0	0			0	0	0
	0	0	0	0		0	0	0			0	0	0
	0	0	0	0		0	0	0			0	0	0
	0	0	0	0		0	0	0			0	1	0
	0	0	0	0		0	0	0			0	0	0
	0	0	0	0		0	0	0			0	0	0
	0	0	0	0		0	0	0			0	0	0
	0	0	0	0		0	0	0			0	0	0
	0	0	0	0		0	0	0			0	0	0
	0	0	0	0		0	0	0			0	0	0
	0	0	0	0		0	0	0			0	0	0
	0	0	0	0		0	0	0			0	0	0
	0	0	0	0		0	0	0			0	0	0
	0	0	0	0		0	0	0			0	1	0
	0	0	0	0		0	0	0			0	0	0
	0	0	0	0		0	0	0			0	0	0
	0	0	0	0		0	0	0			0	0	0
	0	0	0	0		0	0	0			0	0	0
	0	0	0	0		0	0	0			0	0	0
	0	0	0	0		0	0	0			0	0	0
	0	0	0	0		0	0	0			0	0	0
	0	0	0	0		0	0	0			0	1	0
	0	0	0	0		0	0	0			0	0	0
	0	0	0	0		0	0	0			0	0	0
	0	0	0	0		0	0	0			0	0	0
	0	0	0	0		0	0	0			0	0	0
	0	0	0	0		0	0	0			0	0	0
	0	0	0	0		0	0	0			0	0	0
	0	0	0	0		0	0	0			0	0	0
	0	0	0	0		0	0	0			0	0	0
	0	0	0	0		0	0	0			0	0	0
	0	0	0	0		0	0	0			0	0	0
	0	0	0	0		0	0	0			0	0	0
	0	0	0	0		0	0	0			0	0	0
	0	0	0	0		0	0	0			0	0	0
	0	0	0	0		0	0	0			0	0	0
	0	0	0	0		0	0	0			0	0	0
	0	0	0	0		0	0	0			0	1	0
	0	0	0	0		0	0	0			0	0	0
	0	0	0	0		0	0	0			0	0	0
	0	0	0	0		0	0	0			0	0	0
	0	0	0	0		0	0	0			0	0	1
	0	0	0	0		0	0	0			0	0	0
	0	0	0	0		0	0	0			0	1	0
	0	0	0	0		0	0	0			0	0	0
	0	0	0	0		0	0	0			0	0	0
	0	0	0	0		0	0	0			0	1	0
	0	0	0	0		0	0	0			0	0	0
	0	0	0	0		0	0	0			0	0	0
	0	0	0	0		0	0	0			0	1	0
	0	0	0	0		0	0	0			0	0	0
	0	0	0	0		0	0	0			0	0	0
	0	0	0	0		0	0	0			0	0	1
	0	0	0	0		0	0	0			0	1	0
	0	0	0	0		0	0	0			0	0	0
	0	0	0	0		0	0	0			0	0	0
	0	0	0	0		0	0	0			0	1	0
	0	0	0	0		0	0	0			0	0	0
	0	0	0	0		0	0	0			0	1	0
	0	0	0	0		0	0	0			0	1	0
	0	0	0	0		0	0	0			0	0	0
	0	0	0	0		0	0	0			0	0	1
	0	0	0	0		0	0	0			0	0	0
	0	0	0	0		0	0	0			0	0	0
	0	0	0	0		0	0	0			0	0	0
	0	0	0	0		0	0	0			0	0	0
	0	0	0	0		0	0	0			0	0	1
	0	0	0	0		0	0	0			0	0	0
	0	0	0	0		0	0	0			0	0	0
	0	0	0	0		0	0	0			0	1.58496	0
	0	0	0	0		0	0	0			0	0	0
	0	0	0	0		0	0	1			0	0	0
	0	0	0	0		0	0	1			0	0	1
	0	0	0	0		0	0	0			0		0
	0	0	0	0		0	0	0			0		0
	0	0	0	0		0	0	0			0		0
	0	0	0	0		0	0	0			0		0
	0	0	0	0		0	0	0			0		0
	0	0	0	0		0	0	0			0		0
	0	0	0	0		0	0	0			0		0
	0	0	0	0		0	0	1			0		0
	0	0	0	0		0	0	0			0		1
	0	0	0	0		0	0	0			0		0
	0	0	0	0		0	0	0			0		1
	0	0	0	0		0	0	0			0		0
	0	0	0	0		0	0	0			0		0
	0	0	0	0		0	0	0			0		0
	0	0	0	0		0	0	0			0		1
	0	0	0	0		0	0	1			0		0
	0	0	0	0		0	0	0			0		0
	0	0	0	0		0	0	0			0		1
	0	0	0	0		0	0	1			0		1
	0	0	0	0		0	0	0			0		0
	0	0	0	0		0	0	0			0		0
	0	0	0	0		0	0	0			0		0
	0	0	0	0		0	0	1			0		0
	0	0	0	0		0	0	0			0		1
	0	0	0	0		0	0	0			0		0
	0	0	0	0		0	0	0			0		0
	0	0	0	0		0	0	0			0		0
	0	0	0	0		0	0	0			0		0
	0	0	0	0		0	0	0			0		0
	0	0	0	0		0	0	0			0		0
	0	0	0	0		0	0	0			0		0
	0	0	0	0		0	0	0			0		0
	0	0	0	0		0	0	0			0		0
	0	0	0	0		0	0	0			0		1
	0	0	0	0		0	0	0			0		0
	0	0	0	0		0	0	0			0		0
	0	0	0	0		0	0	1			0		0
	0	0	0	0		0	0	0			0		1
	0	0	0	0		0	0	0			0		0
	0	0	0	0		0	0	0			0		0
	0	0	0	0		0	0	1			0		0
	0	0	0	0		0	0	0			0		0
	0	0	0	0		0	0	1			0		0
	0	0	0	0		0	0	0			0		1
	0	0	0	0		0	0	0			0		0
	0	0	0	0		0	0	1			0		0
	0	0	0	0		0	0	0			0		0
	0	0	0	0		0	0	0			0		0
	0	0	0	0		0	0	0			0		0
	0	0	0	0		0	0	1			0		0
	0	0	0	0		0	0	0			0		0
	0	0	0	0		0	0	1.58496			0		1
	0	0	0	0		0	0	0			0		0
	0	0	0	0		0	0	0			0		0
	0	0	0	0		0	0				0		0
	0	0	0	0		0	0				0		0
	0	0	0	0		0	0				0		0
	0	0	0	0		0	0				0		1
	0	0	0	0		0	0				0		1
	0	0	0	0		0	0				0		0
	0	0	0	0		0	0				0		1
	0	0	0	0		0	0				0		0
	0	0	0	0		0	0				0		0
	0	0	0	0		0	0				0		0
	0	0	0	0		0	0				0		0
	0	0	0	0		0	0				0		0
	0	0	0	0		0	0				0		1
	0	0	0	0		0	0				0		1
	0	0	0	0		0	0				0		0
	0	0	0	0		0	0				0		0
	0	0	0	0		0	0				0
	0	0	0	0		0	0				0
	0	0	0	0		0	0				0
	0	0	0	0		0	0				0
	0	0	0	0		0	0				0
	0	0	0	0		0	0				0
	0	0	0	0		0	0				0
	0	0	0	0		0	0				0
	0	0	0	0		0	0				0
	0	0	0	0		0	0				0
	0	0	0	0		0	0				0
	0	0	0	0		0	0				0
	0	0	0	0		0	0				0
	0	0	0	0		0	0				0
	0	0	0	0		0	0				0
	0	0	0	0		0	0				0
	0	0	0	0		0	0				0
	0	0	0	0		0	0				0
	0	0	0	0		0	0				0
	0	0	0	0		0	0				0
	0	0	0	0		0	0				0
	0	0	0	0		0	0				0
	0	0	0	0		0	0				0
	0	0	0	0		0	0				1
	0	0	0	0		0	0				0
	0	0	0	0		0	0				0
	0	0	0	0		0	0				1
	0	0	0	0		0	0				1
	0	0	0	0		0	0				0
	0	0	0	0		0	0				0
	0	0	0	0		0	0				1
	0	0	0	0		0	0				0
	0	0	0	0		0	0				0
	0	0	0	0		0	0				0
	0	0	0	0		0	0				1
	0	0	0	0		0	0				0
	0	0	0	0		0	0				0
	0	0	0	0		0	0				0
	0	0	0	0		0	0				0
	0	0	0	0		0	0				0
	0	0	0	0		0	0				0
	0	0	0	0		0	0				0
	0	0	0	0		0	0				0
	0	0	0	0		0	0				0
	0	0	0	0		0	0				1
	0	0	0	0		0	0				0
	0	0	0	0		0	0				1
	0	0	0	0		0	0				1
	0	0	0	0		0	0				0
	0	0	0	0		0	0				0
	0	0	0	0		0	0				0
	0	0	0	0		0	0				0
	0	0	0	0		0	0				0
	0	0	0	0		0	0				1
	0	0	0	0		0	0				0
	0	0	0	0		0	0				1
	0	0	0	0		0	0				0
	0	0	0	0		0	0				0
	0	0	0	0		0	0				0
	0	0	0	0		0	0				0
	0	0	0	0		0	0				0
	0	0	0	0		0	0				0
	0	0	0	0		0	0				0
	0	0	0	0		0	0				0
	0	0	0	0		0	0				0
	0	0	0	0		0	0				0
	0	0	0	0		0	0				0
	0	0	0	0		0	0				1
	0	0	0	0		0	0				0
	0	0	0	0		0	0				0
	0	0	0	0		0	0				0
	0	0	0	0		0	0				1
	0	0	0	0		0	0				0
	0	0	0	0		0	0				0
	0	0	0	0		0	0				0
	0	0	0	0		0	0				0
	0	0	0	0		0	0				0
	0	0	0	0		0	0				0
	0	0	0	0		0	0				1
	0	0	0	0		0	0				0
	0	0	0	0		0	0				0
	0	0	0	0		0	1				0
	0	0	0	0		0	0				0
	0	0	0	0		0	0				0
	0	0	0	0		0	1				0
	0	0	0	0		0	0				0
	0	0	0	0		0	1				0
	0	0	0	0		0	0				1
	0	0	0	0		0	0				0
	0	0	0	0		0	0				1
	0	0	0	0		0	0				0
	0	0	0	0		0	0				1
	0	0	0	0		0	0				1
	0	0	0	0		1	1				0
	0	0	0	0		0	0				0
	0	0	0	0		1	0				0
	0	0	0	0		0	0				0
	0	0	0	0		0	0				0
	0	0	0	0		1	0				0
	0	0	0	0		0	0				0
	0	0	0	0		0	0				0
	0	0	0	0		0	0				0
	0	0	0	0		0	0				1
	0	0	0	0		0	0				0
	0	0	0	0		0	0				1
	0	0	0	0		0	0				0
	0	0	0	0		0	1				1
	0	0	0	1		1	0				0
	0	0	0	0		0	0				0
	0	0	0	0		0	0				0
	0	0	0	0		0	0				0
	0	0	0	0		0	0				0
	0	0	0	1		0	0				1.58496
	0	0	0	0		0	1				0
	0	0	0	0		0	1				0
	0	0	0	0		0	0				0
	0	0	0	0		0	0				1.58496
	0	0	0	0		0	0				0
	0	0	0	0		1	1				0
	0	0	0	0		0	0				0
	0	0	0	0		0	0				1.58496
	0	0	0	1		1	0				0
	0	0	0	0		0	0				0
	0	0	0	1		0	0				0
	0	0	0	0		1	0				1.58496
	0	0	0	1		1	0				0
	0	0	0	0		0	0				0
	0	0	0	0		0	0				1
	0	0	0	0		0	1				0
	0	0	0	1		0	0
	0	0	0	0		0	1
	0	0	0	0		0	0
	0	0	0	0		0	0
	0	0	0	0		0	0
	0	0	0	0		0	0
	0	0	0	0		1	0
	0	0	0	1		0	0
	0	0	0	0		1	0
	0	0	0	0		1	0
	0	0	0	1		0	0
	0	0	0	1		0	0
	0	0	0	0		0	0
	0	0	0	1		0	0
	0	0	0	0		0	1
	0	0	0	0		0	0
	0	0	0	0		0	0
	0	0	0	0		0	0
	0	0	0	0		0	1
	0	0	0	0		0	0
	0	0	0	1		1	0
	0	0	0	0		1	0
	0	0	0	0		0	0
	0	0	0	0		0	1.58496
	0	0	0	0		0	0
	0	0	0	0		0	0
	0	0	0	0		0	0
	0	0	0	1		0	0
	0	0	0	0		0	0
	0	0	0	0		1	1.58496
	0	0	0	1		0	0
	0	0	0	1		0	0
	0	0	0	0		0	0
	0	0	0	0		0	1
	0	0	0	0		1	0
	0	0	0	0		0	1
	0	0	0	0		0	0
	0	0	0	0		0	0
	0	0	0	0		1	0
	0	0	0	0		0
	0	0	0	0		0
	0	0	0	0		1
	0	0	0	0		0
	0	0	0	0		0
	0	0	0	0		0
	0	0	0	1		0
	0	0	0	0		0
	0	0	0	0		1
	0	0	0	0		1
	0	0	0	0		0
	0	0	0	0		0
	0	0	0	0		0
	0	0	0	0		0
	0	0	0	0		0
	0	0	0	1		0
	0	0	0	1		1
	0	0	0	0		0
	0	0	0	0		0
	0	0	0	0		0
	0	0	0	1		1
	0	0	0	0		0
	0	0	0	0		0
	0	0	0	0		0
	0	0	0	0		0
	0	0	0	0		0
	0	0	0	0		0
	0	0	0	0		1
	0	0	0	0		0
	0	0	0	0		0
	0	0	0	0		0
	0	0	0	0		0
	0	0	0	1		0
	0	0	0	1		0
	0	0	0	1		0
	0	0	0	1		0
	0	0	0	1		0
	0	0	0	0		1
	0	0	0	0		0
	0	0	0	0		0
	0	0	0	1.58496		0
	0	0	0			0
	0	0	0			0
	0	0	0			0
	0	0	0			0
	0	0	0			0
	0	0	0			0
	0	0	0			0
	0	0	0			0
	0	0	0			0
	0	0	0			1
	0	0	0			0
	0	0	0			0
	0	0	0			0
	0	0	0			0
	0	0	0			1
	0	0	0			0
	0	0	0			1
	0	0	0			1
	0	0	0			0
	0	0	0			0
	0	0	0			1
	0	0	0			0
	0	0	0			1
	0	0	0			0
	0	0	0			1
	0	0	0			0
	0	0	0			0
	0	0	0			0
	0	0	0			0
	0	0	0			1
	0	0	0			1
	0	0	0			0
	0	0	0			0
	0	0	0			0
	0	0	0			0
	0	0	0			0
	0	0	0			1.58496
	0	0	0			0
	0	0	0			1.58496
	0	0	0			0
	0	0	0			1.58496
	0	0	0			0
	0	0	0			0
	0	0	0			0
	0	0	0			1.58496
	0	0	0			0
	0	0	0			0
	0	0	0			0
	0	0	0			0
	0	0	0			1.58496
	0	0	0			0
	0	0	0			1.58496
	0	0	0			1
	0	0	0			0
	0	0	0			2
	0	0	0			0
	0	0	0
	0	0	0
	0	0	0
	0	0	0
	0	0	0
	0	0	0
	0	0	0
	0	0	0
	0	0	0
	0	0	0
	0	0	0
	0	0	0
	0	0	0
	0	0	0
	0	0	0
	0	0	0
	0	0	0
	0	0	0
	0	0	0
	0	0	0
	0	0	0
	0	0	0
	0	0	0
	0	0	0
	0	0	0
	0	0	0
	0	0	0
	0	0	0
	0	0	0
	0	0	0
	0	0	0
	0	0	0
	0	0	0
	0	0	0
	0	0	0
	0	0	0
	0	0	0
	0	0	0
	0	0	0
	0	0	0
	0	0	0
	0	0	0
	0	0	0
	0	0	0
	0	0	0
	0	0	0
	0	0	0
	0	0	0
	0	0	0
	0	0	0
	0	0	0
	0	0	0
	0	0	0
	0	0	0
	0	0	0
	0	0	0
	0	0	0
	0	0	0
	0	0	0
	0	0	0
	0	0	0
	0	0	0
	0	0	0
	0	0	0
	0	0	0
	0	0	0
	0	0	0
	0	0	0
	0	0	0
	0	0	0
	0	0	0
	0	0	0
	0	0	0
	0	0	0
	0	0	0
	0	0	0
	0	0	0
	0	0	0
	0	0	0
	0	0	0
	0	0	0
	0	0	0
	0	0	0
	0	0	0
	0	0	0
	0	0	0
	0	0	0
	0	0	0
	0	0	0
	0	0	0
	0	0	0
	0	0	0
	0	0	0
	0	0	0
	0	0	0
	0	0	0
	0	0	0
	0	0	0
	0	0	0
	0	0	0
	0	0	0
	0	0	0
	0	0	0
	0	0	0
	0	0	0
	0	0	0
	0	0	0
	0	0	0
	0	0	0
	0	0	0
	0	0	0
	0	0	0
	0	0	0
	0	0	0
	0	0	0
	0	0	0
	0	0	0
	0	0	0
	0	0	0
	0	0	0
	0	0	0
	0	0	0
	0	0	0
	0	0	0
	0	0	0
	0	0	0
	0	0	0
	0	0	0
	0	0	0
	0	0	0
	0	0	0
	0	0	0
	0	0	0
	0	0	0
	0	0	0
	0	0	0
	0	0	0
	0	0	0
	0	0	0
	0	0	0
	0	0	0
	0	0	0
	0	0	0
	0	0	0
	0	0	0
	0	0	0
	0	0	0
	0	0	0
	0	0	0
	0	0	0
	0	0	0
	0	0	0
	0	0	0
	0	0	0
	0	0	0
	0	0	0
	0	0	0
	0	0	0
	0	0	0
	0	0	0
	0	0	0
	0	0	0
	0	0	0
	0	0	0
	0	0	0
	0	0	0
	0	0	0
	0	0	0
	0	0	0
	0	0	0
	0	0	0
	0	0	0
	0	0	0
	0	0	0
	0	0	0
	0	0	0
	0	0	0
	0	0	0
	0	0	0
	0	0	0
	0	0	0
	0	0	0
	0	0	0
	0	0	0
	0	0	0
	0	0	0
	0	0	0
	0	0	0
	0	0	0
	0	0	0
	0	0	0
	0	0	0
	0	0	0
	0	0	0
	0	0	0
	0	0	0
	0	0	0
	0	0	0
	0	0	0
	0	0	0
	0	0	0
	0	0	0
	0	0	0
	0	0	0
	0	0	0
	0	0	0
	0	0	0
	0	0	0
	0	0	0
	0	0	0
	0	0	0
	0	0	0
	0	0	0
	0	0	0
	0	0	0
	0	0	0
	0	0	0
	0	0	0
	0	0	0
	0	0	0
	0	0	0
	0	0	0
	0	0	0
	0	0	0
	0	0	0
	0	0	0
	0	0	0
	0	0	0
	0	0	0
	0	0	0
	0	0	0
	0	0	0
	0	0	0
	0	0	0
	0	0	0
	0	0	0
	0	0	0
	0	0	0
	0	0	0
	0	0	0
	0	0	0
	0	0	0
	0	0	0
	0	0	0
	0	0	0
	0	0	0
	0	0	0
	0	0	0
	0	0	0
	0	0	0
	0	0	0
	0	0	0
	0	0	0
	0	0	0
	0	0	0
	0	0	0
	0	0	0
	0	0	0
	0	0	0
	0	0	0
	0	0	0
	0	0	0
	0	0	0
	0	0	0
	0	0	0
	0	0	0
	0	0	0
	0	0	0
	0	0	0
	0	0	0
	0	0	0
	0	0	0
	0	0	0
	0	0	0
	0	0	0
	0	0	0
	0	0	0
	0	0	0
	0	0	0
	0	0	0
	0	0	0
	0	0	0
	0	0	0
	0	0	0
	0	0	0
	0	0	0
	0	0	0
	0	0	0
	0	0	0
	0	0	0
	0	0	0
	0	0	0
	0	0	0
	0	0	0
	0	0	0
	0	0	0
	0	0	0
	0	0	0
	0	0	0
	0	0	0
	0	0	0
	0	0	0
	0	0	0
	0	0	0
	0	0	0
	0	0	0
	0	0	0
	0	0	0
	0	0	0
	0	0	0
	0	0	0
	0	0	0
	0	0	0
	0	0	0
	0	0	0
	0	0	0
	0	0	0
	0	0	0
	0	0	0
	0	0	0
	0	0	0
	0	0	0
	0	0	0
	0	0	0
	0	0	0
	0	0	0
	0	0	0
	0	0	0
	0	0	0
	0	0	0
	0	0	0
	0	0	0
	0	0	0
	0	0	0
	0	0	0
	0	0	0
	0	0	0
	0	0	0
	0	0	0
	0	0	0
	0	0	0
	0	0	0
	0	0	0
	0	0	0
	0	0	0
	0	0	0
	0	0	0
	0	0	0
	0	0	0
	0	0	0
	0	0	0
	0	0	0
	0	0	0
	0	0	0
	0	0	0
	0	0	0
	0	0	0
	0	0	0
	0	0	0
	0	0	0
	0	0	0
	0	0	0
	0	0	0
	0	0	0
	0	0	0
	0	0	0
	0	0	0
	0	0	0
	0	0	0
	0	0	0
	0	0	0
	0	0	0
	0	0	0
	0	0	0
	0	0	0
	0	0	0
	0	0	0
	0	0	0
	0	0	0
	0	0	0
	0	0	0
	0	0	0
	0	0	0
	0	0	0
	0	0	0
	0	0	0
	0	0	0
	0	0	0
	0	0	0
	0	0	0
	0	0	0
	0	0	0
	0	0	0
	0	0	0
	0	0	0
	0	0	0
	0	0	0
	0	0	0
	0	0	0
	0	0	0
	0	0	0
	0	0	0
	0	0	0
	0	0	0
	0	0	0
	0	0	0
	0	0	0
	0	0	0
	0	0	0
	0	0	0
	0	0	0
	0	0	0
	0	0	0
	0	0	0
	0	0	0
	0	0	0
	0	0	0
	0	0	0
	0	0	0
	0	0	0
	0	0	0
	0	0	0
	0	0	0
	0	0	0
	0	0	0
	0	0	0
	0	0	0
	0	0	0
	0	0	0
	0	0	0
	0	0	0
	0	0	0
	0	0	0
	0	0	0
	0	0	0
	0	0	0
	0	0	0
	0	0	0
	0	0	0
	0	0	0
	0	0	0
	0	1	0
	0	0	0
	0	0	0
	0	0	0
	0	0	0
	0	0	0
	0	0	0
	0	0	0
	0	0	0
	0	0	0
	0	0	0
	0	0	0
	0	0	0
	0	0	0
	0	0	0
	0	0	0
	0	0	0
	0	0	0
	0	0	0
	0	0	0
	0	0	0
	0	0	0
	0	1	0
	0	0	0
	0	0	0
	0	0	0
	0	0	0
	0	0	0
	0	0	0
	0	1	0
	0	0	0
	0	0	0
	0	1	0
	0	0	0
	0	0	0
	0	0	0
	0	1	0
	0	0	0
	0	0	0
	0	0	0
	0	0	0
	0	0	0
	0	0	0
	0	0	0
	0	0	0
	0	0	0
	0	0	0
	0	0	0
	0	0	0
	0	0	0
	0	0	0
	0	0	0
	0	0	0
	0	0	0
	0	0	0
	0	0	0
	0	1	0
	0	0	0
	0	0	0
	0	0	0
	0	0	0
	0	1	0
	0	1	0
	0	0	0
	0	0	0
	0	0	0
	0	0	0
	0	0	0
	0	0	0
	0	0	0
	0	0	0
	0	0	0
	0	0	0
	0	0	0
	0	0	0
	0	0	0
	0	1	0
	0	0	0
	0	0	0
	0	0	0
	0	0	0
	0	0	0
	0	1	0
	0	0	0
	0	0	0
	0	0	0
	0	0	0
	0	1	0
	0	0	0
	0	0	0
	0	1	0
	0	0	0
	0	0	0
	0	0	0
	0	0	0
	0	0	0
	0	0	0
	0	1	0
	0	0	0
	0	0	0
	0	0	0
	0	0	0
	0	1	0
	0	0	0
	0	1	0
	0	1	0
	0	1	0
	0	0	0
	0	0	0
	0	0	0
	0	1	0
	0	1	0
	0	0	0
	0	0	0
	0	0	0
	0	0	0
	0	0	0
	0	0	0
	0	1	0
	0	0	0
	0	0	0
	0	0	0
	0	0	0
	0	0	0
	0	0	0
	0	0	0
	0	0	0
	0	1	0
	0	0	0
	0	0	0
	0	0	0
	0	0	0
	0	0	0
	0	0	0
	0	0	0
	0	0	0
	0	0	0
	0	0	0
	0	0	0
	0	0	0
	0	0	0
	0	0	0
	0	1	0
	0	0	0
	0	0	0
	0	1	0
	0	0	0
	0	1	0
	0	1	0
	0	1	0
	0	1	0
	0	1	0
	0	0	0
	0	0	0
	0	0	0
	0	1.58496	0
	0	0	0
	0	1.58496	0
	0	0	0
	0	0	0
	0	0	0
	0	0	0
	0	1.58496	0
	0	0	0
	0	1.58496	0
	0	0	0
	0	0	0
	0	0	0
	0	0	0
	0	0	0
	0	0	0
	0	0	0
	0	1.58496	0
	0	0	0
	0	1.58496	0
	0	0	0
	0	0	0
	0	0	0
	0	0	0
	0	0	0
	0	0	0
	0	0	1
	0	2	0
	0	0	0
	0		1
	0		1
	0		0
	0		1
	0		1
	0		1
	0		0
	0		0
	0		0
	0		0
	0		0
	0		0
	0		1
	0		1
	0		0
	0		0
	0		0
	0		0
	0		0
	0		0
	0		1
	0		0
	0		0
	0		0
	0		0
	0		0
	0		0
	0		0
	0		1
	0		1
	0		0
	0		0
	0		0
	0		1
	0		0
	0		0
	0		0
	0		0
	0		0
	0		1
	0		1
	0		0
	0		0
	0		0
	0		0
	0		0
	0		0
	0		0
	0		0
	0		0
	0		1
	0		1
	0		0
	0		0
	0		0
	0		0
	0		0
	0		0
	0		0
	0		0
	0		0
	0		0
	0		0
	0		0
	0		0
	0		1
	0		0
	0		0
	0		0
	0		0
	0		1
	0		0
	0		0
	0		0
	0		0
	0		0
	0		0
	0		0
	0		0
	0		1
	0		0
	0		0
	0		1
	0		0
	0		1
	0		0
	0		0
	0		0
	0		0
	0		1
	0		0
	0		0
	0		0
	0		0
	0		0
	0		0
	0		0
	0		0
	0		0
	0		0
	0		1
	0		0
	0		0
	0		1
	0		0
	0		0
	0		0
	0		0
	0		0
	0		0
	0		0
	0		0
	0		0
	0		1
	0		0
	0		0
	0		0
	0		0
	0		1
	0		0
	0		0
	0		0
	0		0
	0		0
	0		0
	0		0
	0		0
	0		0
	0		0
	0		0
	0		0
	0		0
	0		0
	0		0
	0		1
	0		0
	0		0
	0		0
	0		0
	0		0
	0		1
	0		0
	0		0
	0		1
	0		0
	0		0
	0		0
	0		0
	0		0
	0		0
	0		0
	0		0
	0		0
	0		0
	0		0
	0		0
	0		0
	0		0
	0		0
	0		0
	0		0
	0		0
	0		0
	0		0
	0		1
	0		0
	0		0
	0		0
	0		0
	0		0
	0		1
	0		0
	0		0
	0		0
	0		0
	0		1
	0		0
	0		0
	0		0
	0		0
	0		0
	0		0
	0		0
	0		0
	0		0
	0		0
	0		0
	0		0
	0		0
	0		0
	0		0
	0		0
	0		0
	0		0
	0		0
	0		0
	0		0
	0		0
	0		0
	0		0
	0		0
	0		0
	0		0
	0		0
	0		0
	0		0
	0		0
	0		1
	0		0
	0		1
	0		1
	0		1
	0		0
	0		1
	0		0
	0		0
	0		1
	0		0
	0		0
	0		0
	0		0
	0		0
	0		0
	0		0
	0		0
	0		0
	0		0
	0		0
	0		1
	0		1
	0		0
	0		1
	0		1
	0		1
	0		0
	0		1
	0		0
	0		0
	0		0
	0		0
	0		0
	0		0
	0		0
	0		0
	0		0
	0		0
	0		0
	0		0
	0		0
	0		1
	0		0
	0		1
	0		0
	0		0
	0		0
	0		0
	0		0
	0		0
	0		1
	0		0
	0		1
	0		0
	0		0
	0		0
	0		0
	0		0
	0		0
	0		0
	0		0
	0		0
	0		1
	0		1
	0		0
	0		1
	0		0
	0		0
	0		1
	0		0
	0		1
	0		0
	0		0
	0		0
	0		1
	0		1
	0		1
	0		0
	0		1
	0		0
	0		0
	0		1
	0		0
	0		0
	0		0
	0		0
	0		0
	0		0
	0		0
	0		0
	0		0
	0		1.58496
	0		0
	0		0
	0		0
	0		0
	0		1
	0		1.58496
	0
	0
	0
	0
	0
	0
	0
	0
	0
	0
	0
	0
	0
	0
	0
	0
	0
	0
	0
	0
	0
	0
	0
	0
	0
	0
	0
	0
	0
	0
	0
	0
	0
	0
	0
	0
	0
	0
	0
	0
	0
	0
	0
	0
	0
	0
	0
	0
	0
	0
	0
	0
	0
	0
	0
	0
	0
	0
	0
	0
	0
	0
	0
	0
	0
	0
	0
	0
	0
	0
	0
	0
	0
	0
	0
	0
	0
	0
	0
	0
	0
	0
	0
	0
	0
	0
	0
	0
	0
	0
	0
	0
	0
	0
	0
	0
	0
	0
	0
	0
	0
	0
	0
	0
	0
	0
	0
	0
	0
	0
	0
	0
	0
	0
	0
	0
	0
	0
	0
	0
	0
	0
	0
	0
	0
	0
	0
	0
	0
	0
	0
	0
	0
	0
	0
	0
	0
	0
	0
	0
	0
	0
	0
	0
	0
	0
	0
	0
	0
	0
	0
	0
	0
	0
	0
	0
	0
	0
	0
	0
	0
	0
	0
	0
	0
	0
	0
	0
	0
	0
	0
	0
	0
	0
	0
	0
	0
	0
	0
	0
	0
	0
	0
	0
	0
	0
	0
	0
	0
	0
	0
	0
	0
	0
	0
	0
	0
	0
	0
	0
	0
	0
	0
	0
	0
	0
	0
	0
	0
	0
	0
	0
	0
	0
	0
	0
	0
	0
	0
	0
	0
	0
	0
	0
	0
	0
	0
	0
	0
	0
	0
	0
	0
	0
	0
	0
	0
	0
	0
	0
	0
	0
	0
	0
	0
	0
	0
	0
	0
	0
	0
	0
	0
	0
	0
	0
	0
	0
	0
	0
	0
	0
	0
	0
	0
	0
	0
	0
	0
	0
	0
	0
	0
	0
	0
	0
	0
	0
	0
	0
	0
	0
	0
	0
	0
	0
	0
	0
	0
	0
	0
	0
	0
	0
	0
	0
	0
	0
	0
	0
	0
	0
	0
	0
	0
	0
	0
	0
	0
	0
	0
	0
	0
	0
	0
	0
	0
	0
	0
	0
	0
	0
	0
	0
	0
	0
[truncated: 6,834 more rows]

## Sheet: Figure 3
	Fig. 3B Olfactory preference index during aging in Drosophila											Fig. 3B Two way ANOVA with Bonferronis multiple comparisons test results
		Hidroxyquininie			3-Octanol			2,3-Butanedione				Bonferroni´s multiple comparisons test.	Mean Diff.	95.00% CI of diff.	Adjusted P Value	N1	N2
	0 dpe	-0.72	-0.7	-0.79	-0.70667	-0.72	-0.69333	0.746667	0.693333	0.84
	15 dpe	-0.63	-0.57	-0.62	-0.50667	-0.41333	-0.49333	0.613333	0.386667	0.44		Hidroxyquininie
	30 dpe	-0.37	-0.41	-0.45	-0.37333	-0.44	-0.44	0.32	0.306667	0.4		0 vs. 15	-0.13	-0.2499 to -0.01012	0.0316	3	3
	45 dpe	-0.2	-0.14	-0.07	-0.12	-0.09333	-0.12	0.16	0.106667	0.013333		0 vs. 30	-0.3267	-0.4465 to -0.2068	<0.0001	3	3
												0 vs. 45	-0.6	-0.7199 to -0.4801	<0.0001	3	3
												3-Octanol
												0 vs. 15	-0.2356	-0.3554 to -0.1157	0.0002	3	3
												0 vs. 30	-0.2889	-0.4088 to -0.1690	<0.0001	3	3
												0 vs. 45	-0.5956	-0.7154 to -0.4757	<0.0001	3	3
												2,3-Butanedione
												0 vs. 15	0.28	0.1601 to 0.3999	<0.0001	3	3
												0 vs. 30	0.4178	0.2979 to 0.5377	<0.0001	3	3
												0 vs. 45	0.6667	0.5468 to 0.7865	<0.0001	3	3
	Fig. 3C Olfactory preference index 0 and 45 dpe with RNAi UPRmt activators
		0 dpe			45 dpe							Figure 13A. Two-way ANOVA with Bonferroni´s multiple comparisons test result
	Control	-0.74	-0.61	-0.76	-0.05	-0.22	-0.29					Bonferroni's multiple comparisons test	Mean Diff.	95.00% CI of diff.	Adjusted P Value	N1	N2
	dve	-0.26	-0.2	-0.19	-0.23	-0.09	-0.18					0 - 45
	ubl	-0.31	-0.33	-0.41	-0.05556	-0.02778	-0.22222					Control	-0.5167	-0.7155 to -0.3179	<0.0001	3	3
	crc	-0.28	-0.31	-0.33	0.016667	-0.23333	-0.175					dve	-0.05	-0.2488 to 0.1488	>0.9999	3	3
												ubl	-0.2481	-0.4469 to -0.04935	0.0116	3	3
												crc	-0.1761	-0.3749 to 0.02269	0.0962	3	3
												0
												Control vs. dve	-0.4867	-0.6699 to -0.3034	<0.0001	3	3
												Control vs. ubl	-0.3533	-0.5366 to -0.1701	0.0004	3	3
												Control vs. crc	-0.3967	-0.5799 to -0.2134	0.0001	3	3
												45
												Control vs. dve	-0.02	-0.2032 to 0.1632	0.9841	3	3
												Control vs. ubl	-0.08481	-0.2680 to 0.09841	0.5048	3	3
												Control vs. crc	-0.05611	-0.2393 to 0.1271	0.769	3	3
	3D H3K9Me3 Levels in Drosophila Brain											Figure 3D. H3K9Me3 levels (A.U.) One-way ANOVA Bonferroni's multiple comparisons test result
	Control	dSetdb1 RNAi	utx RNAi	kdm2 RNAi								Bonferroni's multiple comparisons test	Mean Diff.	95.00% CI of diff.	Adjusted P Value	N1	N2
	1	0.978164	1.37696	1.95356								Control vs. dSetdb1 RNAi	0.1579	-1.201 to 1.517	0.9738	3	3
	1	0.921345	3.05506	1.23729								Control vs. utx RNAi	-1.438	-2.797 to -0.07872	0.0391	3	3
	1	0.626847	2.88154	2.5768								Control vs. kdm2 RNAi	-0.9225	-2.282 to 0.4366	0.1951	3	3
	3E olfactory function elav RNAi UPRmt											Figure 3E. Two-way ANOVA Bonferroni´s multiple comparisons test result
			0			45						Bonferroni's multiple comparisons test	Mean Diff.	95.00% CI of diff.	Adjusted P Value	N1	N2
	3-octanol	control -	-0.67333	-0.7	-0.66667	-0.27333	-0.3	-0.15333				0 - 45
		dSetdb1 -	-0.78	-0.7	-0.82667	-0.64667	-0.56667	-0.54667				3-Octanol (-)
		utx -	-0.24	-0.12	-0.18	0.013333	-0.14667	-0.06667				control -	-0.4378	-0.5695 to -0.3061	<0.0001	3	3
		kdm2 -	-0.28667	-0.30667	-0.21333	-0.14	-0.20667	-0.16667				dSetdb1 -	-0.1822	-0.3139 to -0.05054	0.0624	3	3
	2,3 Butanedione	control +	0.753333	0.686667	0.726667	0.14	0.186667	0.16				utx -	-0.1133	-0.2450 to 0.01835	0.1356	3	3
		dSetdb1 +	0.74	0.753333	0.686667	0.646667	0.586667	0.606667				kdm2 -	-0.09778	-0.2295 to 0.03391	0.298	3	3
		utx +	0.153333	0.22	0.286667	0.074074	0.1	0.146667				2.3 Butanedione (+)
		kdm2 +	0.18	0.066667	0.186667	0.06	0.233333	0.148148				control +	0.56	0.4283 to 0.6917	<0.0001	3	3
												dSetdb1 +	0.1133	-0.01835 to 0.2450	0.1356	3	3
												utx +	0.1131	-0.01860 to 0.2448	0.1374	3	3
												kdm2 +	-0.002716	-0.1344 to 0.1290	>0.9999	3	3
												3-Octanol (-)
												0
												control - vs. dSetdb1 -	0.08889	-0.03377 to 0.2115	0.1846	3	3
												control - vs. utx -	-0.5	-0.6227 to -0.3773	<0.0001	3	3
												control - vs. kdm2 -	-0.4111	-0.5338 to -0.2885	<0.0001	3	3
												45
												control - vs. dSetdb1 -	0.3445	0.2218 to 0.4671	<0.0001	3	3
												control - vs. utx -	-0.1756	-0.2982 to -0.05289	0.0052	3	3
												control - vs. kdm2 -	-0.07111	-0.1938 to 0.05155	0.3346	3	3
												2.3 Butanedione (+)
												0
												control + vs. dSetdb1 +	-0.004444	-0.1147 to 0.1058	0.9991	3	3
												control + vs. utx +	0.5022	0.3920 to 0.6125	<0.0001	3	3
												control + vs. kdm2 +	0.5778	0.4675 to 0.6880	<0.0001	3	3
												45
												control + vs. dSetdb1 +	-0.4511	-0.5614 to -0.3408	<0.0001	3	3
												control + vs. utx +	0.05531	-0.05496 to 0.1656	0.4441	3	3
												control + vs. kdm2 +	0.01506	-0.09521 to 0.1253	0.9701	3	3

## Sheet: Figure 4
	Fig. 4B H3K9Me3 integrated density in GH146.GFP dSetdb1RNAi											Figure 4B Two-way ANOVA Bonferroni's multiple comparisons test
		0										Bonferroni's multiple comparisons test	Mean Diff.	95.00% CI of diff.	Adjusted P Value	N1	N2
	Control	27195.7	25307.1	19729.7	35875.4	38934.4	16302.3	43990.1				0 - 45
	dSetdb1 RNAi	17943.7	34597.5	6397.28	11380.6	31299.2	16017.5	38901.5				Control	-31645	-51063 to -12227	0.0014	7	7
		45										dSetdb1 RNAi	817.5	-18600 to 20235	>0.9999	7	7
	Control	49040.2	42275.8	30145	97335.8	58101.9	91762	60189.5				Control - dSetdb1 RNAi
	dSetdb1 RNAi	15575.3	22781.3	17907.8	17266.5	33769.3	25689.2	17825.5				0	7257	-12161 to 26675	0.7609	7	7
												45	39719	20302 to 59137	0.0001	7	7
	Fig. 4C H3K9Me3 integrated density in GH146.GFP dSetdb1RNAi
		0										Figure 4C Two-way ANOVA Bonferroni's multiple comparisons test
	Control	0.562421	0.72443	1.25211	0.726276	1.2628	1.13204	1.33992				Bonferroni's multiple comparisons test	Mean Diff.	95.00% CI of diff.	Adjusted P Value	N1	N2
	dSetdb1 RNAi	0.999782	0.85074	0.410654	0.288171	1.1605	0.444546	1.55073				0 - 45
		45										Control	-0.6148	-1.097 to -0.1323	0.0111	7	7
	Control	1.86892	1.202	1.24343	2.30279	1.78882	1.3861	1.51123				dSetdb1 RNAi	0.05078	-0.4317 to 0.5333	>0.9999	7	7
	dSetdb1 RNAi	0.402192	0.39481	1.06472	0.670111	0.643464	1.02001	1.15437				Control - dSetdb1 RNAi
												0	0.185	-0.2975 to 0.6675	0.7369	7	7
												45	0.8505	0.3680 to 1.333	0.0006	7	7
	Fig. 4E GH146,GFP;Hsp60::dsRed integrated density											Figure 4E. Two-way ANOVA Bonferroni´s multiple comparisons test result
		0										Bonferroni's multiple comparisons test	Mean Diff.	95.00% CI of diff.	Adjusted P Value	N1	N2
	Control Veh	433383	122529	264005	263898	258727	330213	477298	202519	778287		0 - 45
	Control PQ	888159	871134	1.20375e+06	940365	930112	648456	1.11542e+06	1.74366e+06	713983		Control Veh	-81045	-567888 to 405797	0.9883	9	9
	dSetdb1 Veh	450872	605425	551641	1.14671e+06	1.34558e+06	1125450	1.12983e+06	593576	670017		Control PQ	627501	140658 to 1114343	0.0063	9	9
	dSetdb1 PQ	1.97426e+06	675142	858014	826545	1.48101e+06	1.50061e+06	531836	1.87817e+06	435481		dSetdb1 Veh	-126883	-613726 to 359959	0.9407	9	9
		45										dSetdb1 PQ	-458989	-945831 to 27854	0.0721	9	9
	Control Veh	491430	723356	268523	317641	507098	270686	451556	290775	539202		0
	Control PQ	284793	172599	803741	315567	437489	458136	227658	483891	223665		Control Veh vs. Control PQ	-658243	-1159316 to -157170	0.0051	9	9
	dSetdb1 Veh	1.4443e+06	1.05806e+06	1.12323e+06	784031	1.13562e+06	1360055	552058	584832	718882		Control Veh vs. dSetdb1 Veh	-498694	-999768 to 2379	0.0516	9	9
	dSetdb1 PQ	2.10034e+06	2.39244e+06	2.05582e+06	1.0915e+06	1.44384e+06	1.86684e+06	2.29254e+06	606431	442228		Control Veh vs. dSetdb1 PQ	-781134	-1282207 to -280061	0.0006	9	9
												45
												Control Veh vs. Control PQ	50303	-450770 to 551376	0.9934	9	9
												Control Veh vs. dSetdb1 Veh	-544532	-1045606 to -43459	0.028	9	9
												Control Veh vs. dSetdb1 PQ	-1159077	-1660151 to -658004	<0.0001	9	9
	4G Hsp60A AUC expression levels in OPN					4H Hsc70-5 AUC expression levels in OPN						Figure 4G. Hsp60A AUC in OPN two-way ANOVA with Dunnett's multiple comparison test results.
	0	15	30	50		0	15	30	50			Dunnett's multiple comparisons test	Mean Diff.	95.00% CI of diff.	Adjusted P Value	n1	n2
	0	0	0	0		0	0	0	0			0 vs. 15	0.9765	0.2060 to 1.747	0.0056	60	14
	0	0	0	0		1	0	0	0			0 vs. 30	0.5009	-0.01105 to 1.013	0.0584	60	45
	0	0	0	1		1	0	1	0			0 vs. 50	0.6458	0.1076 to 1.184	0.0102	60	38
	1	0	0	1		0	0	0	0
	1	0	1	1		0	0	1	0			Figure 4H. Hsc70-5 AUC in OPN two-way ANOVA with Dunnett's multiple comparison test results.
	1	1	1	1		0	1.58496	1	0			Dunnett's multiple comparisons test	Mean Diff.	95.00% CI of diff.	Adjusted P Value	n1	n2
	1	2	1	1		0	0	1.58496	0			0 vs. 15	0.4383	-0.2162 to 1.093	0.3653	60	14
	1	2	1.58496	1		1	1	0	0			0 vs. 30	0.6839	0.07802 to 1.290	0.0184	60	45
	1.58496	2.32193	1.58496	1.58496		0	0	0	0			0 vs. 50	0.7578	0.3006 to 1.215	<0.0001	60	38
	1.58496	2.32193	1.58496	1.58496		0	1	0	0
	1.58496	2.32193	1.58496	1.58496		0	1	0	0			Figure 4I. dSedtb1 AUC in OPN two-way ANOVA with Dunnett's multiple comparison test results.
	1.58496	2.32193	1.58496	1.58496		1	1	1	0			Dunnett's multiple comparisons test	Mean Diff.	95.00% CI of diff.	Adjusted P Value	n1	n2
	1.58496	2.32193	1.58496	1.58496		1	1	0	0			0 vs. 15	0.02106	-0.1087 to 0.1509	0.0056	84	26
	2	2.32193	2	1.58496		0	1.58496	1	0			0 vs. 30	0.006892	-0.08468 to 0.09846	0.0584	84	76
	2	2.58496	2	1.58496		0	0	1	0			0 vs. 50	-0.02976	-0.1295 to 0.07002	0.0102	84	56
	2	2.58496	2	1.58496		0	0	1.58496	0
	2	2.58496	2	1.58496		1	1	1	0			Figure 4J. utx AUC in OPN two-way ANOVA with Dunnett's multiple comparison test results.
	2	2.58496	2	2		1.58496	1		0			Dunnett's multiple comparisons test	Mean Diff.	95.00% CI of diff.	Adjusted P Value	n1	n2
	2	2.58496	2	2		2	2.58496		0			0 vs. 15	0.1163	-0.1001 to 0.3327	0.4597	84	26
	2	2.80735	2	2		2	1		0			0 vs. 30	-0.02945	-0.1821 to 0.1232	0.9477	84	76
	2	2.80735	2	2		2.32193	1		0			0 vs. 50	-0.005952	-0.1723 to 0.1604	0.9996	84	56
	2.32193	2.80735	2	2		0	1.58496		1
	2.32193	2.80735	2.32193	2		0	1.58496		1			Figure 4K. kdm2 AUC in OPN two-way ANOVA with Dunnett's multiple comparison test results.
	2.32193	2.80735	2.32193	2.32193		1	1.58496		1			Dunnett's multiple comparisons test	Mean Diff.	95.00% CI of diff.	Adjusted P Value	n1	n2
	2.32193	2.80735	2.32193	2.32193		1.58496	1.58496		1			0 vs. 15	0.007326	-0.2039 to 0.2186	0.9996	84	26
	2.32193	2.80735	2.32193	2.32193		2	2.32193		1			0 vs. 30	0.1591	0.01013 to 0.3082	0.0326	84	76
	2.32193	3	2.32193	2.32193		2	1		1			0 vs. 50	0.1667	0.004282 to 0.3291	0.0425	84	56
	2.58496	3	2.32193	2.58496		1	1		1
	2.58496	3	2.58496	2.58496		1	1.58496		1
	2.80735	3	2.58496	2.58496		0	2		1
	2.80735	3.16992	2.58496	2.58496		1	1.58496		1
	2.80735	3.32193	2.80735	2.80735		1	1		1
	2.80735	3.32193	2.80735	3		1	1		1
	2.80735	3.32193	2.80735	3		1.58496	1		1.58496
	2.80735	3.32193	2.80735	3.16992		2.58496	1.58496		1.58496
	3	3.32193	3	3.32193		1.58496	1.58496		1.58496
	3.16992	3.32193	3	3.58496		0	2		1.58496
	3.16992	3.32193	3	3.70044		2	2.32193		1.58496
	3.16992	3.58496	3			2.32193	0
	3.32193	3.70044	3			0	1
	3.32193	3.70044	3.16992			1	2.32193
	3.32193	3.80735	3.16992			2	1
	3.32193	3.80735	3.16992			2.32193	2
	3.45943	3.80735	3.32193			0	2.32193
	3.45943	3.90689	3.45943			2.32193	0
	3.45943					2.32193
	3.58496					1
	3.58496					3.16992
	3.70044					1
	3.70044					2
	3.70044					2.32193
	3.80735					2.58496
	3.80735					3
	3.90689					2
	4.08746					1.58496
	4.08746					1.58496
	4.08746					2.80735
	4.32193					3.16992
	4.45943					2.58496
	4.45943					2.58496
	Figure 4I. dSedtb1 AUC in OPN					Figure 5J. utx AUC in OPN						Figure 4K. kdm2 AUC in OPN
	0	15	30	50		0	15	30	50			0	15	30	50
	0	0	0	0		0	0	0	0			0	0	0	0
	0	0	0	0		0	0	0	0			0	0	0	0
	0	0	0	0		0	0	0	0			0	0	0	0
	0	0	0	0		0	0	0	0			0	0	0	0
	0	0	0	0		0	0	0	0			0	0	0	0
	0	0	0	0		0	0	0	0			0	0	0	0
	0	0	0	0		0	0	0	0			0	0	0	0
	0	0	0	0		0	0	0	0			0	0	0	0
	0	0	0	0		0	0	0	0			0	0	0	0
	0	0	0	0		0	0	0	0			0	0	0	0
	0	0	0	0		0	0	0	0			0	0	0	0
	0	0	0	0		0	0	0	0			0	0	0	0
	0	0	0	0		0	0	0	0			0	0	0	0
	0	0	0	0		0	0	0	0			0	0	0	0
	0	0	0	0		0	0	0	0			0	0	0	0
	0	0	0	0		0	0	0	0			0	0	0	0
	0	0	0	0		0	0	0	0			0	0	0	0
	0	0	0	0		0	0	0	0			0	0	0	0
	0	0	0	0		0	0	0	0			0	0	0	0
	0	0	0	0		0	0	0	0			0	0	0	0
	0	0	0	0		0	0	0	0			0	0	0	0
	0	0	0	0		0	0	0	0			0	1	0	0
	0	1	0	0		0	0	0	0			0	0	0	0
	0	0	0	0		0	2	0	0			0	0	0	0
	0	0	0	0		0	2	0	0			0	0	0	0
	0	0	0	0		0	2	0	0			0	0	0	0
	0		0	0		0		0	0			0		0	0
	0		0	0		0		0	0			0		0	0
	0		0	0		0		0	0			0		0	0
	0		0	0		0		0	0			0		0	0
	0		0	0		0		0	0			0		0	0
	0		0	0		0		0	0			0		0	0
	0		0	0		0		0	0			0		0	0
	0		0	0		0		0	0			0		0	0
	0		0	0		0		0	0			0		0	0
	0		0	0		0		0	0			0		0	0
	0		0	0		0		0	0			0		0	0
	0		0	0		0		0	0			0		0	0
	0		0	0		0		0	0			0		0	0
	0		0	0		0		0	0			0		0	0
	0		0	0		0		0	0			0		0	1
	0		0	0		0		0	0			0		0	1
	0		0	0		0		0	0			0		0	1
	0		0	0		0		0	0			0		0	1
	0		0	0		0		0	0			0		0	1
	0		0	0		0		0	0			0		0	1
	0		0	0		0		0	0			0		0	1
	0		0	0		0		0	1			0		0	0
	0		0	0		0		0	0			0		0	2
	0		0	1		0		0	0			0		0	0
	0		0	0		0		0	1			0		0	0
	0		0	1		0		0	0			0		0	0
	0		0	1		0		0	0			1		0	0
	0		0	1		0		0	0			1		0	0
	0		0	0		0		0	1			1		1	0
	0		0	1		0		0	1			1		1	0
	0		0			0		0				1		1
	0		0			0		0				1		1
	0		0			0		0				1		1
	0		0			0		0				1		1
	0		0			1		0				0		1
	0		0			1		0				0		1
	0		0			1		0				0		1
	0		0			1		0				0		1
	0		0			1		1				0		0
	1		1			0		0				0		0
	1		0			0		1				0		0
	0		0			1		1				0		0
	0		0			1		1				0		0
	0		0			1		0				0		2
	0		0			1		1				0		0
	0		1			1		0				0		0
	1		1			0		0				0		0
	0		0			1		1				0		0
	1		1			0		0				0		0
	1		0			0		0				0		2
	0					1						0
	0					2						0
	0					1						0
	0					1						0
	0					1						1
	0					1						1
	0					1						1
	0					1						2
	4L Olfactory Function GH146 RNAi dsetdb1 dve crc										Figure 4L. Two-way ANOVA Bonferroni´s multiple comparisons test result
		0			45						Bonferroni's multiple comparisons test	Mean Diff.	95.00% CI of diff.	Adjusted P Value	N1	N2
	Control	0.686667	0.706667	0.733333	0.22	0.086667	0.106667				0 - 45
	dSetdb1	0.713333	0.648485	0.653333	0.64	0.586667	0.686667				Control	0.5711	0.4303 to 0.7120	<0.0001	3	3
	dve	0.2	0.16	0.293333	0.22	0.1	0.213333				dSetdb1	0.03394	-0.1069 to 0.1748	>0.9999	3	3
	dSetdb1/dve	0.22	0.238889	0.22	0.148148	0.253333	0.17037				dve	0.04	-0.1008 to 0.1808	>0.9999	3	3
	crc	0.233333	0.113333	0.115152	0.26	0.106667	0.12				dSetdb1/dve	0.03568	-0.1052 to 0.1765	>0.9999	3	3
	dsetdb1/crc	0.3	0.3	0.14	0.12	0.133333	0.173333				crc	-0.008283	-0.1491 to 0.1326	>0.9999	3	3
											dsetdb1/crc	0.1044	-0.03640 to 0.2453	0.2606	3	3
											0
											Control vs. dSetdb1	0.03717	-0.09487 to 0.1692	0.9063	3	3
											Control vs. dve	0.4911	0.3591 to 0.6232	<0.0001	3	3
											Control vs. dSetdb1/dve	0.4826	0.3506 to 0.6146	<0.0001	3	3
											Control vs. crc	0.5549	0.4229 to 0.6870	<0.0001	3	3
											Control vs. dsetdb1/crc	0.4622	0.3302 to 0.5943	<0.0001	3	3
											45
											Control vs. dSetdb1	-0.5	-0.6320 to -0.3680	<0.0001	3	3
											Control vs. dve	-0.04	-0.1720 to 0.09204	0.8795	3	3
											Control vs. dSetdb1/dve	-0.05284	-0.1849 to 0.07920	0.7227	3	3
											Control vs. crc	-0.02444	-0.1565 to 0.1076	0.9819	3	3
											Control vs. dsetdb1/crc	-0.004444	-0.1365 to 0.1276	0.9999	3	3

## Sheet: Figure 5
		Figure 5C AL MitoGFP integrated density												Figure 5C AL MitoGFP integrated density Two-way ANOVA Bonferroni's multiple comparisons test results
			0											Bonferroni's multiple comparisons test	Mean Diff.	95.00% CI of diff.	Adjusted P Value	N1	N2
		Control	19858.2	13252.4	18859.3	25412.8	15037	25693.7	10353.4	15655.8	25827.9			0 - 45
		dSetdb1 RNAi	17127.3	15360.5	35016	18082.1	5836.72	6859.64	22820.3	15640.2	13781.3			Control	-20248	-35477 to -5018	0.0018	9	9
			45											dSetdb1 RNAi	-6848	-22077 to 8382	0.0855	9	9
		Control	8421.9	2069.57	8933.33	2122.38	3849.99	1844.43	2519.02	5790.84	17295.5			Control - dSetdb1 RNAi
		dSetdb1 RNAi	20609.6	31185.3	18502.4	25260	15992.8	12369.6	45139.6	23759.6	25188.1			0	2158	-6198 to 10515	>0.9999	9	9
														45	-18351	-26707 to -9995	<0.0001	9	9
		Figure 5D AL MitoGFP total volumen
			0											Figure 5D AL MitoGFP total volumen Two-way ANOVA Bonferroni's multiple comparisons test results
		Control	516.01	444.66	432.88	682.26	355.72	601.34	332.16	512.51				Bonferroni's multiple comparisons test	Mean Diff.	95.00% CI of diff.	Adjusted P Value	N1	N2
		dSetdb1 RNAi	361.24	357.24	656.99	526.31	259	252.54	637.88	369.22				0 - 45
			45											Control	280.8	152.1 to 409.6	<0.0001	9	9
		Control	169.38	329.52	267.32	242.25	245.94	135.52	185.74	181.02				dSetdb1 RNAi	87.64	-41.15 to 216.4	0.2387	9	9
		dSetdb1 RNAi	299.98	498	369.08	249.47	251.89	238.04	426.3	345.75				Control - dSetdb1 RNAi
														0	89.97	-38.82 to 218.8	0.2204	9	9
														45	-103.2	-232.0 to 25.55	0.137	9	9
		Figure 5E AL MitoGFP Fragmentation Index
			0											Figure 5E AL MitoGFP Fragmentation Index Two-way ANOVA Bonferroni's multiple comparisons test results
		Control	0.893832	0.867969	1.08381	1.05767	1.1239	1.08702	0.856296	1.00895	1.02055			Bonferroni's multiple comparisons test	Mean Diff.	95.00% CI of diff.	Adjusted P Value	N1	N2
		dSetdb1 RNAi	0.962396	0.831419	0.818101	0.828181	0.828637	0.865083	0.812657	0.843129	0.862628			0 - 45
			45											Control	0.1427	0.02573 to 0.2597	0.0145	9	9
		Control	0.907337	0.876029	1.01106	0.631472	0.704571	0.777986	0.990818	0.997176	0.819042			dSetdb1 RNAi	-0.01253	-0.1295 to 0.1045	>0.9999	9	9
		dSetdb1 RNAi	0.813718	1.12045	0.781317	0.872639	0.703474	0.851197	0.936404	0.883085	0.802755			Control - dSetdb1 RNAi
														0	0.1498	0.03276 to 0.2667	0.0101	9	9
														45	-0.005505	-0.1225 to 0.1115	>0.9999	9	9
		Figure 5F AL MitoGFP Sphericity Index
			0											Figure 5F AL MitoGFP Sphericity Index Two-way ANOVA Bonferroni's multiple comparisons test results
		Control	0.71	0.72	0.66	0.7	0.68	0.7	0.69	0.67	0.68			Bonferroni's multiple comparisons test	Mean Diff.	95.00% CI of diff.	Adjusted P Value	N1	N2
		dSetdb1 RNAi	0.55	0.62	0.6	0.47	0.54	0.6	0.78	0.74	0.64			0 - 45
			45											Control	-0.09222	-0.1517 to -0.03273	0.0019	9	9
		Control	0.8	0.76	0.82	0.78	0.74	0.75	0.82	0.78	0.79			dSetdb1 RNAi	-0.06667	-0.1262 to -0.007178	0.0257	9	9
		dSetdb1 RNAi	0.67	0.66	0.67	0.75	0.65	0.71	0.66	0.68	0.69			Control - dSetdb1 RNAi
														0	0.07444	0.01496 to 0.1339	0.012	9	9
														45	0.1	0.04051 to 0.1595	0.0008	9	9
		Figure 5H Axonal MitoGFP integrated density
			0											Figure 5H Axonal MitoGFP integrated density Two-way ANOVA Bonferroni's multiple comparisons test results
		Control	26694.1	16649.4	18133	11616.5	15991.3	38939.7	20466.8	18162.5				Bonferroni's multiple comparisons test	Mean Diff.	95.00% CI of diff.	Adjusted P Value	N1	N2
		dSetdb1 RNAi	44956.1	15173.2	15303.9	20122.8	11553.2	11245.4	25308	15464.9				0 - 45
			45											Control	15931	6876 to 24985	0.0005	9	9
		Control	10746.8	3587.13	6883.05	1305.1	5514.52	3311.78	1907.91	5952.55				dSetdb1 RNAi	3432	-5623 to 12486	0.754	9	9
		dSetdb1 RNAi	12669.4	12508.1	17740.4	12814.4	14660.1	20891.2	27543.3	12846.6				Control - dSetdb1 RNAi
														0	940.7	-8114 to 9995	>0.9999	9	9
														45	-11558	-20613 to -2504	0.0106	9	9
		Figure 5J Lateral Horn MitoGFP integrated density
			0											Figure 5J Lateral Horn MitoGFP integrated density Two-way ANOVA Bonferroni's multiple comparisons test results
		Control	63499.9	106568	74083.9	91722.4	120197	158581						Bonferroni's multiple comparisons test	Mean Diff.	95.00% CI of diff.	Adjusted P Value	N1	N2
		dSetdb1 RNAi	161648	106812	73444.8	117012	196742	150300						0 - 45
			45											Control	280.8	152.1 to 409.6	0.1197	9	9
		Control	114279	66238.8	94032.2	41443.1	33196.1	9136.69						dSetdb1 RNAi	87.64	-41.15 to 216.4	0.0751	9	9
		dSetdb1 RNAi	69834.2	63752.8	58467.5	131220	56774.6	92357.2						Control - dSetdb1 RNAi
														0	-31884	-83770 to 20001	0.3041	9	9
														45	-19014	-70899 to 32872	0.7702	9	9
		Figure 5L AL MitoTimer Red/Gren integrated density ratio										Figure 5L AL MitoTimer Red/Gren integrated density ratio Two-way ANOVA Bonferroni's multiple comparisons test results
			0									Bonferroni's multiple comparisons test	Mean Diff.	95.00% CI of diff.	Adjusted P Value	N1	N2
		Control	0.62	0.87	0.65	0.67	0.71	0.53	0.57	0.5		0 - 45
		dSetdb1 RNAi	1.85	0.82	1.15	1.17	1.48	0.79	1	0.91		Control	-1.86	-2.630 to -1.090	<0.0001	8	8
			45									dSetdb1 RNAi	-0.41	-1.180 to 0.3605	0.4359	8	8
		Control	3.73	4.17	2.85	1.22	3.17	2.26	1.66	0.94		Control - dSetdb1 RNAi
		dSetdb1 RNAi	1.1	2.14	1.38	1.51	1.81	1.78	1.79	0.94		0	-0.5063	-1.277 to 0.2642	0.2618	8	8
												45	0.9438	0.1733 to 1.714	0.0143	8	8
		Figure 5N Axonal MitoTimer Red/Gren integrated density ratio										Figure 5N Axonal MitoTimer Red/Gren integrated density ratio Two-way ANOVA Bonferroni's multiple comparisons test results
			0									Bonferroni's multiple comparisons test	Mean Diff.	95.00% CI of diff.	Adjusted P Value	N1	N2
		Control	0.17	1.25	1.25	1.07	0.55	0.61	0.92	0.2		0 - 45
		dSetdb1 RNAi	2.05	2.22	1.51	1.45	1.31	1.01	0.79	1.39		Control	-0.8925	-1.767 to -0.01831	0.0447	8	8
			45									dSetdb1 RNAi	0.06125	-0.8129 to 0.9354	>0.9999	8	8
		Control	0.76	3.43	3.79	0.82	0.73	1.56	1.22	0.85		Control - dSetdb1 RNAi
		dSetdb1 RNAi	1.99	1.95	1.63	0.78	0.85	1.35	1.43	1.26		0	-0.7138	-1.588 to 0.1604	0.1266	8	8
												45	0.24	-0.6342 to 1.114	>0.9999	8	8
		Figure 5P LH MitoTimer Red/Gren integrated density ratio										Figure 5P LH MitoTimer Red/Gren integrated density ratio Two-way ANOVA Bonferroni's multiple comparisons test results
			0									Bonferroni's multiple comparisons test	Mean Diff.	95.00% CI of diff.	Adjusted P Value	N1	N2
		Control	0.71	0.36	1.08	1.01	0.73	0.98	0.91	0.97		0 - 45
		dSetdb1 RNAi	1.03	1.31	1.76	1.62	1.81	0.71	1.5	0.82		Control	-2.925	-3.796 to -2.054	<0.0001	8	8
			45									dSetdb1 RNAi	-0.7113	-1.582 to 0.1594	0.1263	8	8
		Control	3.44	4.03	6.09	2	2.21	4.27	3.63	4.48		Control - dSetdb1 RNAi
		dSetdb1 RNAi	2.37	1.66	1.51	2.29	2.2	1.28	2.38	2.56		0	-0.7138	-1.588 to 0.1604	0.4114	8	8
												45	0.24	-0.6342 to 1.114	0.0001	8	8

## Sheet: Figure 6
FIG. 6B Nucleus number in AL (in GFP +)													FIG. 6B Nucleus number in AL (in GFP +) Two-way ANOVA multiple comparison test results.
	0												Bonferroni's multiple comparisons test	Mean Diff.	95.00% CI of diff.	Adjusted P Value	N1	N2
Control	125	110	179	217	95	153	148	177	211	219			0 - 45
dSetdb1 RNAi	111	159	178	178	216	157	197	152	175	166			Control	43.8	4.657 to 82.94	0.0233	10	10
dve RNAi	176	170	175	108	103	140	166	114	133	92			dSetdb1 RNAi	9.6	-29.54 to 48.74	>0.9999	10	10
	45												dve RNAi	1.1	-38.04 to 40.24	>0.9999	10	10
Control	104	83	89	104	91	181	114	157	137	136			0
dSetdb1 RNAi	131	152	139	153	148	148	164	177	211	170			Control vs. dSetdb1 RNAi	-5.5	-43.68 to 32.68	0.9358	10	10
dve RNAi	80	189	166	197	110	169	170	114	79	92			Control vs. dve RNAi	25.7	-12.48 to 63.88	0.2451	10	10
													dSetdb1 RNAi vs. dve RNAi	31.2	-6.979 to 69.38	0.1296	10	10
													45
													Control vs. dSetdb1 RNAi	-39.7	-77.88 to -1.521	0.0398	10	10
													Control vs. dve RNAi	-17	-55.18 to 21.18	0.5347	10	10
													dSetdb1 RNAi vs. dve RNAi	22.7	-15.48 to 60.88	0.3314	10	10
FIG. 6D Axonal GFP integrated density													FIG. 6D Axonal GFP integrated density Two-way ANOVA with Bonferroni's multiple comparisons test results.
	0												Bonferroni's multiple comparisons test	Mean Diff.	95.00% CI of diff.	Adjusted P Value	N1	N2
Control	495660	178395	593586	349551	383602	249631	248367	329772	166767	459819			0 - 45
dSetdb1 RNAi	247407	387030	496881	160355	120372	147824	202879	309557	407335	255265			Control	235070	117192 to 352948	<0.0001	10	10
dve RNAi	277313	8249.97	33767.6	59356.4	57544.1	299724	312712	99823.7	68834.8	94881.6			dSetdb1 RNAi	32504	-85374 to 150383	>0.9999	10	10
	45												dve RNAi	28199	-89680 to 146077	>0.9999	10	10
Control	57378.6	103306	42380	106332	133166	112594	141098	134401	116458	157334			0
dSetdb1 RNAi	72457.4	248468	99914.5	290234	320421	364165	147149	271633	382083	213335			Control vs. dSetdb1 RNAi	72024	-45854 to 189903	0.4108	10	10
dve RNAi	128383	108047	256400	205830	32901.9	16460.5	14660.8	50728.5	88691.6	128114			Control vs. dve RNAi	214294	96416 to 332173	0.0001	10	10
													dSetdb1 RNAi vs. dve RNAi	142270	24392 to 260148	0.0129	10	10
													45
													Control vs. dSetdb1 RNAi	-130541	-248419 to -12663	0.0252	10	10
													Control vs. dve RNAi	7423	-110455 to 125301	>0.9999	10	10
													dSetdb1 RNAi vs. dve RNAi	137964	20086 to 255843	0.0165	10	10
	FIG. 6F LH GFP integrated density													Figure 6F. LH GFP Integrated density Two-way ANOVA with Bonferroni's multiple comparisons test results.
	Control	162062	131276	263169	376667	490229	555448	357100	552851	404990	319812			Bonferroni's multiple comparisons test	Mean Diff.	95.00% CI of diff.	Adjusted P Value	N1	N2
	dSetdb1 RNAi	415850	431306	447644	402639	435484	465284	433692	344580	151104	282153			0 - 45
	dve RNAi	406728	290557	94396	94776.3	66745.2	275354	178840	155824	489449	161297			Control	235070	117192 to 352948	<0.0001	10	10
		45												dSetdb1 RNAi	32504	-85374 to 150383	>0.9999	10	10
	Control	112344	109228	181469	210786	131409	166976	50972.3	231171	175018	147094			dve RNAi	28199	-89680 to 146077	>0.9999	10	10
	dSetdb1 RNAi	534100	291757	410628	151636	369432	279600	349171	324318	265787	251118			0
	dve RNAi	274503	312588	170254	136635	380957	62037.7	52287.5	98860.4	64497.4	68237.1			Control vs. dSetdb1 RNAi	-19613	-146473 to 107246	>0.9999	10	10
														Control vs. dve RNAi	139964	13104 to 266823	0.0259	10	10
														dSetdb1 RNAi vs. dve RNAi	159577	32718 to 286436	0.009	10	10
														45
														Control vs. dSetdb1 RNAi	-171108	-297967 to -44249	0.0047	10	10
														Control vs. dve RNAi	-10439	-137298 to 116420	>0.9999	10	10
														dSetdb1 RNAi vs. dve RNAi	160669	33810 to 287528	0.0085	10	10
			Figure 6H LH Brp::GFP integrated density											Figure 6H LH Brp::GFP integrated density Two-way ANOVA Bonferroni's multiple comparisons test results
				0										Bonferroni's multiple comparisons test	Mean Diff.	95.00% CI of diff.	Adjusted P Value	N1	N2
			Control	100883	184064	223839	213850	249953	202510					0 - 45
			dSetdb1 RNAi	275389	99654.9	134193	97077.7	109124	162176					Control	102420	34531 to 170309	0.0031	6	6
				45										dSetdb1 RNAi	22017	-45872 to 89906	0.8823	6	6
			Control	18014.6	99654.9	134193	97077.7	109124	102515					Control - dSetdb1 RNAi
			dSetdb1 RNAi	87859.8	111110	151948	151431	127552	115610					0	49581	-18309 to 117470	0.1841	6	6
														45	-30822	-98711 to 37067	0.5687	6	6
			Figure 6I LH Brp::GFP punctae number											Figure 6I LH Brp::GFP punctae number Two-way ANOVA Bonferroni's multiple comparisons test results
			0											Bonferroni's multiple comparisons test	Mean Diff.	95.00% CI of diff.	Adjusted P Value	N1	N2
			Control	17016	14098	16588	15292	15733	16151					0 - 45
			dSetdb1 RNAi	15695	15191	13574	13555	15298	16721					Control	4757	2565 to 6949	<0.0001	6	6
				45										dSetdb1 RNAi	348	-1844 to 2540	>0.9999	6	6
			Control	12149	11612	12113	10294	9298	10868					Control - dSetdb1 RNAi
			dSetdb1 RNAi	19252	14419	12907	15224	13317	12827					0	807.3	-1385 to 2999	0.7655	6	6
														45	-3602	-5794 to -1410	0.0015	6	6

## Sheet: Figure 1 - Figure Supplement 2
	Figure 1 - Supplement 2E. Int- Density normalized to control BRAIN				Figure 1 - Supplement 2G. Int- Density normalized to control GUT				Figure 1 - Supplement 2E. Int- Density normalized to control Brain
	Vehicle	PQ			Vehicle	PQ			Tm vs vehicle	t	df	Difference between means (B - A) ± SEM	95% confidence interval	P-value	n1	n2
	0.880144	1.92159			1.04921	0.781571			Tm vs vehicle	2765	10	0,7369 ± 0,2665	0,1431 to 1,331	0.0411	6	6
	0.819018	1.81015			1.10556	1.50556
	1.04272	1.96665			0.959285	1.91838
	1.2226	0.94893			0.733035	1.70574
	1.20623	1.13403			1.10972	1.58685			Figure 1 - Supplement 2F.Manders coeficcient Brain
	0.873674	2.68439			1.04319	1.99087			Tm vs vehicle	t	df	Difference between means (B - A) ± SEM	95% confidence interval	P-value	n1	n2
									Tm vs vehicle	4459	10	-0,2939 ± 0,06591	-0,4408 to -0,1471	0.0012	6	6
	Figure 1 - Supplement 2F.Manders coeficcient Brain				Figure 1 - Supplement 2H.Manders coeficcient Brain GUT
	Vehicle	PQ			Vehicle	PQ
	0.9459	0.5085			0.4177	0.3907			Figure 1 - Supplement 2G. Int- Density normalized to control GUT
	0.6451	0.5157			0.4377	0.3923			Tm vs vehicle	t	df	Difference between means (B - A) ± SEM	95% confidence interval	P-value	n1	n2
	0.9326	0.7005			0.4344	0.3154			Tm vs vehicle	3119	10	0,5815 ± 0,1864	0,1661 to 0,9969	0.0109	6	6
	0.7414	0.4078			0.6551	0.4042
	0.9495	0.57			0.4717	0.3185
	0.8669	0.6154			0.3821	0.3821
									Figure 1 - Supplement 2H.Manders coeficcient Brain GUT
									Tm vs vehicle	t	df	Difference between means (B - A) ± SEM	95% confidence interval	P-value	n1	n2
									Tm vs vehicle	2322	10	-0,09925 ± 0,04274	-0,1945 to -0,004029	0.0426	6	6

## Sheet: Figure 1 - Figure Supplement 3
	Figure 1 - Figure Supplement 3A. Hsp60::dsRed integrated density					Figure 1 - Figure Supplement 3A. Hsp60::dsRed integrated density Two-way ANOVA Bonferroni's multiple comparisons test result
	vehicle	PQ	Tm			Dunnet's multiple comparisons test	Mean Diff.	95.00% CI of diff.	Adjusted P Value	n1	n2
	71158.1	147621	295969			vehicle vs. PQ	-225802	-391064 to -60541	0.0061	9	11
	117561	713621	157099			vehicle vs. Tm	-11355	-190016 to 167307	0.9863	9	8
	370515	574396	135869			PQ vs. Tm	214448	43600 to 385295	0.0119	11	8
	126886	481299	121975
	139843	274445	194561
	141712	217348	297089
	136400	302098	285209
	92550.3	373157	121302
	511391	609512
		542360
		335543
	Figure 1 - Figure Supplement 3D. XBP1::GFP integrated density					Figure 1 - Figure Supplement 3D. XBP1::GFP integrated density Unpaired t test Tm vs Vehicle
	vehicle	Tm				Unpaired t- test	t	df	Difference between means (B - A) ± SEM	95% confidence interval	P-value	n1	n2
	1031202	1119434				Tm vs vehicle	2.637	11	639001 ± 242320	105658 to 1172344	0.0231	7	8
	548205	1.25061e+06
	991475	1.52863e+06
	1106794	2400289
	1168455	1946660
	1364807	1189690
		2283787

## Sheet: Figure 3 - Figure Supplement 1
		Figure 3 - Figure Supplement 1: Survival Curve RNAi dsetdb1, utx, kdm2 Summary data
			Control	dSetdb1	utx	kdm2		Figure 3 - Figure Supplement 1: Survival Curve RNAi dsetdb1, utx, kdm2 Comparison of Survival Curves
		Number of rows	400	400	400	400		Log-rank (Mantel-Cox) test (recommended)
		# of blank rows	300	300	300	300		Chi square	42.89
		# rows with impossible data	0	0	0	0		df	3
		# censored subjects	0	0	0	0		P value	<0,0001
		# deaths/events	100	100	100	100		P value summary	****
								Are the survival curves sig different?	Yes
		Median survival	69	78	71	67
								Logrank test for trend (recommended)
		Figure 3 - Figure Supplement 1: Survival Curve RNAi dsetdb1, utx, kdm2 raw data						Chi square	12.59
		dpe	Control	dSetdb1	utx	kdm2		df	1
		10	1					P value	0.0004
		17	1					P value summary	***
		31	1					Sig. trend?	Yes
		36	1
		46	1					Gehan-Breslow-Wilcoxon test
		46	1					Chi square	33.11
		48	1					df	3
		48	1					P value	<0,0001
		48	1					P value summary	****
		48	1					Are the survival curves sig different?	Yes
		50	1
		50	1
		53	1
		53	1
		53	1
		53	1
		55	1
		57	1
		57	1
		57	1
		57	1
		57	1
		57	1
		60	1
		60	1
		60	1
		60	1
		60	1
		60	1
		60	1
		60	1
		60	1
		60	1
		62	1
		62	1
		62	1
		62	1
		62	1
		64	1
		67	1
		67	1
		67	1
		67	1
		67	1
		67	1
		67	1
		67	1
		69	1
		69	1
		69	1
		69	1
		71	1
		71	1
		71	1
		74	1
		74	1
		74	1
		74	1
		74	1
		74	1
		74	1
		74	1
		74	1
		74	1
		74	1
		74	1
		74	1
		74	1
		74	1
		76	1
		76	1
		76	1
		76	1
		76	1
		78	1
		78	1
		78	1
		81	1
		81	1
		81	1
		81	1
		81	1
		81	1
		83	1
		83	1
		83	1
		83	1
		83	1
		83	1
		83	1
		83	1
		83	1
		85	1
		85	1
		85	1
		88	1
		88	1
		90	1
		90	1
		90	1
		7		1
		7		1
		10		1
		10		1
		12		1
		12		1
		19		1
		21		1
		24		1
		26		1
		31		1
		31		1
		46		1
		48		1
		48		1
		50		1
		62		1
		67		1
		67		1
		67		1
		69		1
		69		1
		69		1
		74		1
		74		1
		74		1
		74		1
		74		1
		74		1
		74		1
		74		1
		74		1
		74		1
		74		1
		74		1
		76		1
		76		1
		76		1
		76		1
		76		1
		76		1
		76		1
		76		1
		76		1
		76		1
		76		1
		76		1
		76		1
		78		1
		78		1
		78		1
		78		1
		78		1
		78		1
		78		1
		78		1
		78		1
		81		1
		81		1
		81		1
		81		1
		81		1
		81		1
		81		1
		81		1
		81		1
		81		1
		81		1
		81		1
		81		1
		81		1
		81		1
		81		1
		81		1
		83		1
		83		1
		83		1
		85		1
		85		1
		85		1
		85		1
		85		1
		85		1
		85		1
		85		1
		85		1
		85		1
		85		1
		85		1
		88		1
		88		1
		88		1
		88		1
		90		1
		90		1
		90		1
		90		1
		90		1
		92		1
		92		1
		1			1
		5			1
		12			1
		14			1
		14			1
		17			1
		36			1
		36			1
		39			1
		46			1
		46			1
		48			1
		48			1
		50			1
		50			1
		50			1
		53			1
		53			1
		53			1
		53			1
		53			1
		53			1
		53			1
		53			1
		55			1
		55			1
		55			1
		55			1
		57			1
		60			1
		60			1
		60			1
		60			1
		60			1
		60			1
		62			1
		62			1
		62			1
		64			1
		64			1
		64			1
		64			1
		67			1
		67			1
		69			1
		69			1
		69			1
		71			1
		71			1
		71			1
		71			1
		71			1
		71			1
		71			1
		71			1
		71			1
		71			1
		71			1
		71			1
		71			1
		74			1
		74			1
		74			1
		74			1
		74			1
		74			1
		74			1
		74			1
		74			1
		74			1
		74			1
		74			1
		74			1
		74			1
		74			1
		74			1
		74			1
		74			1
		74			1
		74			1
		74			1
		76			1
		78			1
		78			1
		78			1
		78			1
		78			1
		81			1
		81			1
		81			1
		81			1
		81			1
		81			1
		81			1
		83			1
		83			1
		83			1
		83			1
		85			1
		85			1
		7				1
		7				1
		7				1
		10				1
		12				1
		12				1
		12				1
		28				1
		28				1
		31				1
		31				1
		39				1
		39				1
		39				1
		41				1
		43				1
		48				1
		48				1
		50				1
		50				1
		53				1
		53				1
		55				1
		55				1
		55				1
		55				1
		57				1
		57				1
		57				1
		57				1
		60				1
		60				1
		60				1
		60				1
		60				1
		62				1
		62				1
		62				1
		62				1
		62				1
		62				1
		62				1
		64				1
		64				1
		64				1
		67				1
		67				1
		67				1
		67				1
		67				1
		67				1
		67				1
		67				1
		67				1
		67				1
		67				1
		67				1
		71				1
		71				1
		74				1
		74				1
		74				1
		74				1
		74				1
		74				1
		74				1
		74				1
		74				1
		74				1
		74				1
		76				1
		76				1
		76				1
		76				1
		76				1
		76				1
		76				1
		78				1
		78				1
		78				1
		78				1
		81				1
		81				1
		81				1
		81				1
		81				1
		81				1
		81				1
		81				1
		81				1
		81				1
		81				1
		83				1
		83				1
		83				1
		83				1
		83				1
		83				1
		83				1
		88				1

[truncated: 3 more sheets: Figure 4 - Figure supplement 1, Figure 4 - Figure Supplement 2, Figure 5 - Figure Supplement 2]
