# Supplementary figures and images for: Age-dependent H3K9 trimethylation by dSetdb1 impairs mitochondrial UPR leading to degeneration of olfactory neurons and loss of olfactory function in Drosophila
Source: eLife journal article supplement (doi:10.7554/elife.103118), 2026-03-26

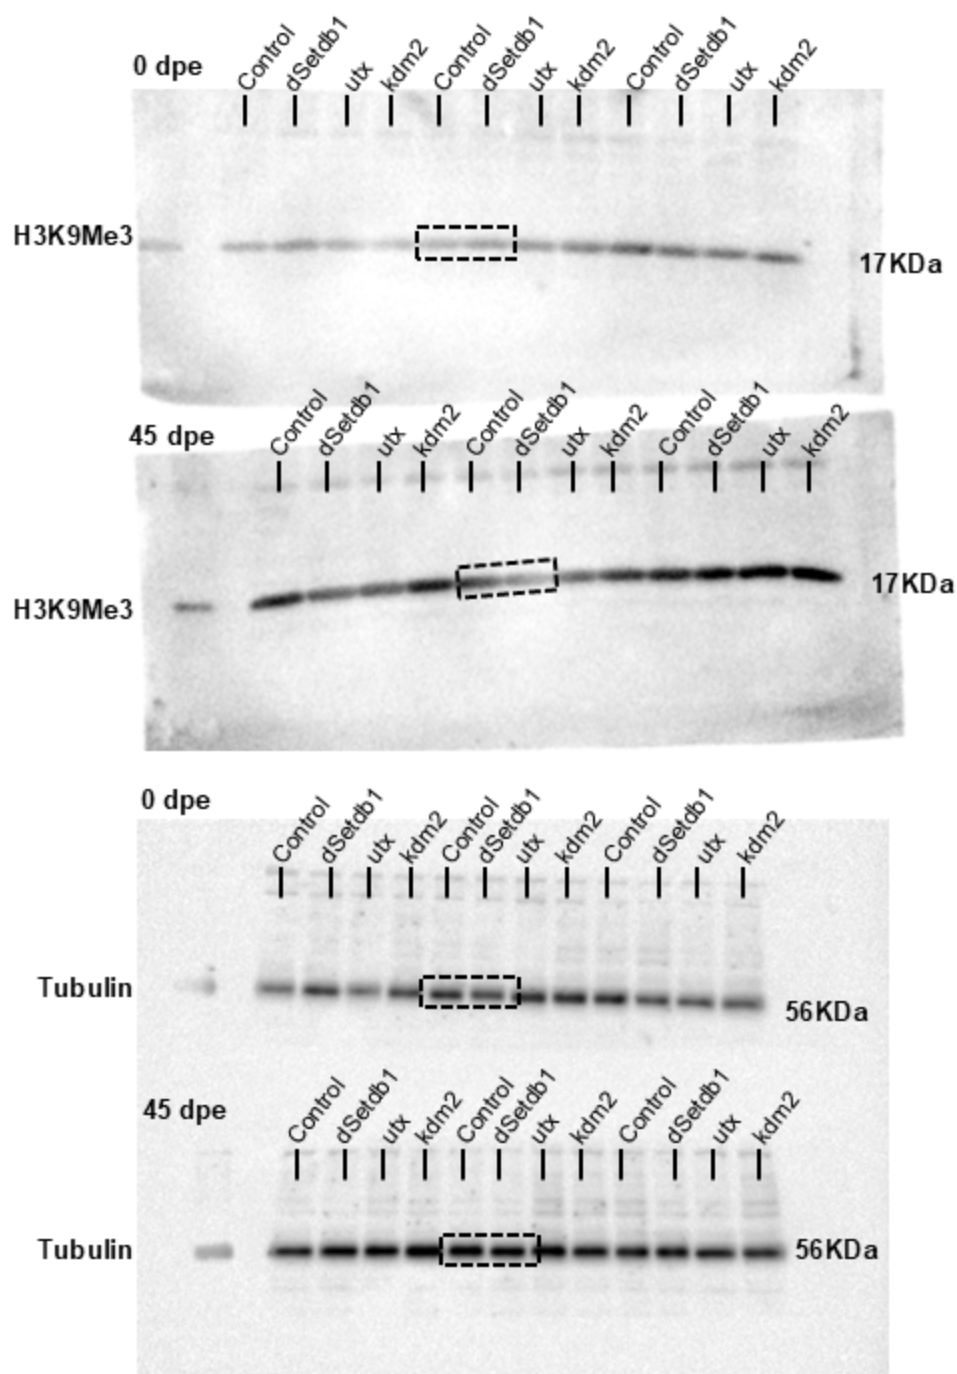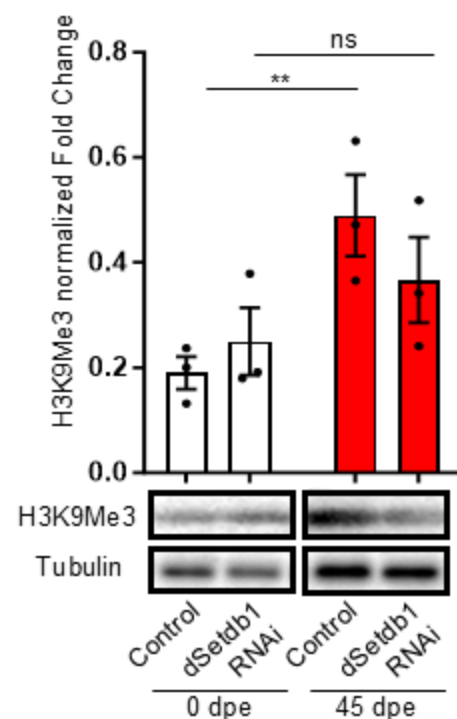

Figure 2 - source data 1  
Labelled blots

Supplement: fig2-data1 [file Figure 2A Source Data 1 - Labelled blots.pdf › Figure 2-source data 1/Figure 2A Source Data 1 - Labelled blots.pdf]

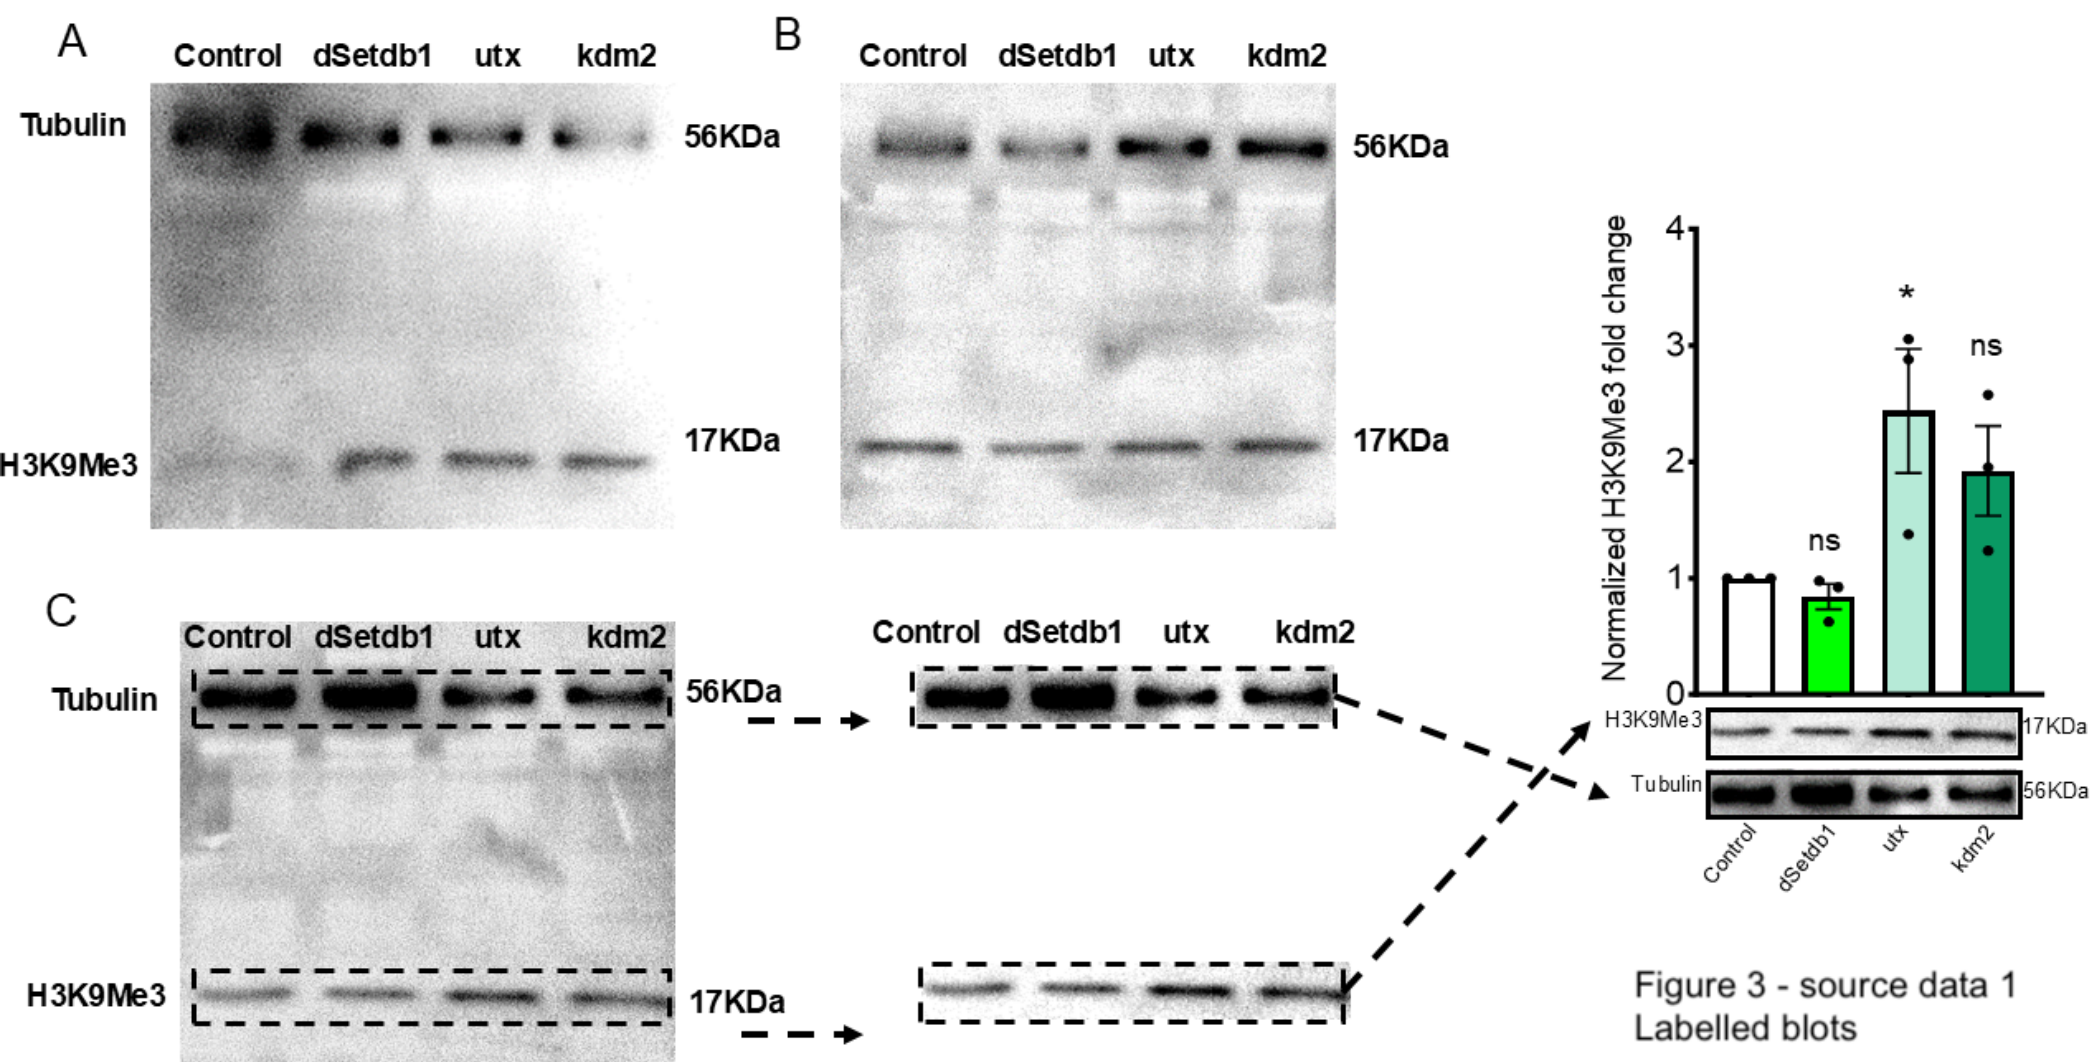

Supplement: fig3-data1 [file Figure 3D Source Data 1 - Labelled blots.pdf › Figure 3-source data 1/Figure 3D Source Data 1 - Labelled blots.pdf]
